# Supplementary material for: Novel Anti-Aging Benzoquinone Derivatives from Onosma bracteatum Wall
Source: PubMed Central journal article supplement (PMC6479397; doi:10.3390/molecules24071428), 2019-04-11
Supplement: molecules-24-01428-s001.pdf [file molecules-24-01428-s001.pdf]

## Supplementary Data for

### **Novel Anti-Aging Benzoquinone Derivatives from *Onosma bracteatum* Wall**

Umer Farooq<sup>1</sup>, Yanjun Pan<sup>1</sup>, Dejene Disasa<sup>1</sup> and Jianhua Qi<sup>1,\*</sup>

<sup>1</sup> College of Pharmaceutical Sciences, Zhejiang University, Yu Hang Tang Road 866, Hangzhou 310058, China; 11519039@zju.edu.cn (U.F.); 21719029@zju.edu.cn (Y.P.); 11719053@zju.edu.cn (D.D.)

\* Correspondence: qjianhua@zju.edu.cn; Tel.: +86-571-8820-8627 (J.Q.)

## Contents

**Figure S1.**  $^1\text{H}$  NMR spectrum of allomicrophyllone (**1**) measured in  $\text{CDCl}_3$ .

**Figure S2.**  $^{13}\text{C}$  NMR spectrum of allomicrophyllone (**1**) measured in  $\text{CDCl}_3$ .

**Figure S3.**  $^1\text{H}$  NMR spectrum of ehretiquinone (**2**) measured in  $\text{CDCl}_3$ .

**Figure S4.**  $^{13}\text{C}$  NMR spectrum of ehretiquinone (**2**) measured in  $\text{CDCl}_3$ .

**Figure S5.**  $^1\text{H}$  NMR spectrum of ehretiquinone B (**3**) measured in  $\text{CDCl}_3$ .

**Figure S6.**  $^{13}\text{C}$  NMR spectrum of ehretiquinone B (**3**) measured in  $\text{CDCl}_3$ .

**Figure S7.**  $^1\text{H}$ - $^1\text{H}$  COSY spectrum of ehretiquinone B (**3**) measured in  $\text{CDCl}_3$ .

**Figure S8.** HSQC spectrum of ehretiquinone B (**3**) measured in  $\text{CDCl}_3$ .

**Figure S9.** HMBC spectrum of ehretiquinone B (**3**) measured in  $\text{CDCl}_3$ .

**Figure S10.** NOESY spectrum of ehretiquinone B (**3**) measured in  $\text{CDCl}_3$ .

**Figure S11.**  $^1\text{H}$  NMR spectrum of ehretiquinone C (**4**) measured in  $\text{CDCl}_3$ .

**Figure S12.**  $^{13}\text{C}$  NMR spectrum of ehretiquinone C (**4**) measured in  $\text{CDCl}_3$ .

**Figure S13.**  $^1\text{H}$ - $^1\text{H}$  COSY spectrum of ehretiquinone C (**4**) measured in  $\text{CDCl}_3$ .

**Figure S14.** HSQC spectrum of ehretiquinone C (**4**) measured in  $\text{CDCl}_3$ .

**Figure S15.** HMBC spectrum of ehretiquinone C (**4**) measured in  $\text{CDCl}_3$ .

**Figure S16.** NOESY spectrum of ehretiquinone C (**4**) measured in  $\text{CDCl}_3$ .

**Figure S17.**  $^1\text{H}$  NMR spectrum of ehretiquinone D (**5**) measured in  $\text{CDCl}_3$ .

**Figure S18.**  $^{13}\text{C}$  NMR spectrum of ehretiquinone D (**5**) measured in  $\text{CDCl}_3$ .

**Figure S19.**  $^1\text{H}$ - $^1\text{H}$  COSY spectrum of ehretiquinone D (**5**) measured in  $\text{CDCl}_3$ .

**Figure S20.** HSQC spectrum of ehretiquinone D (**5**) measured in  $\text{CDCl}_3$ .

**Figure S21.** HMBC spectrum of ehretiquinone D (**5**) measured in  $\text{CDCl}_3$ .

**Figure S22.** NOESY spectrum of ehretiquinone D (**5**) measured in  $\text{CDCl}_3$ .

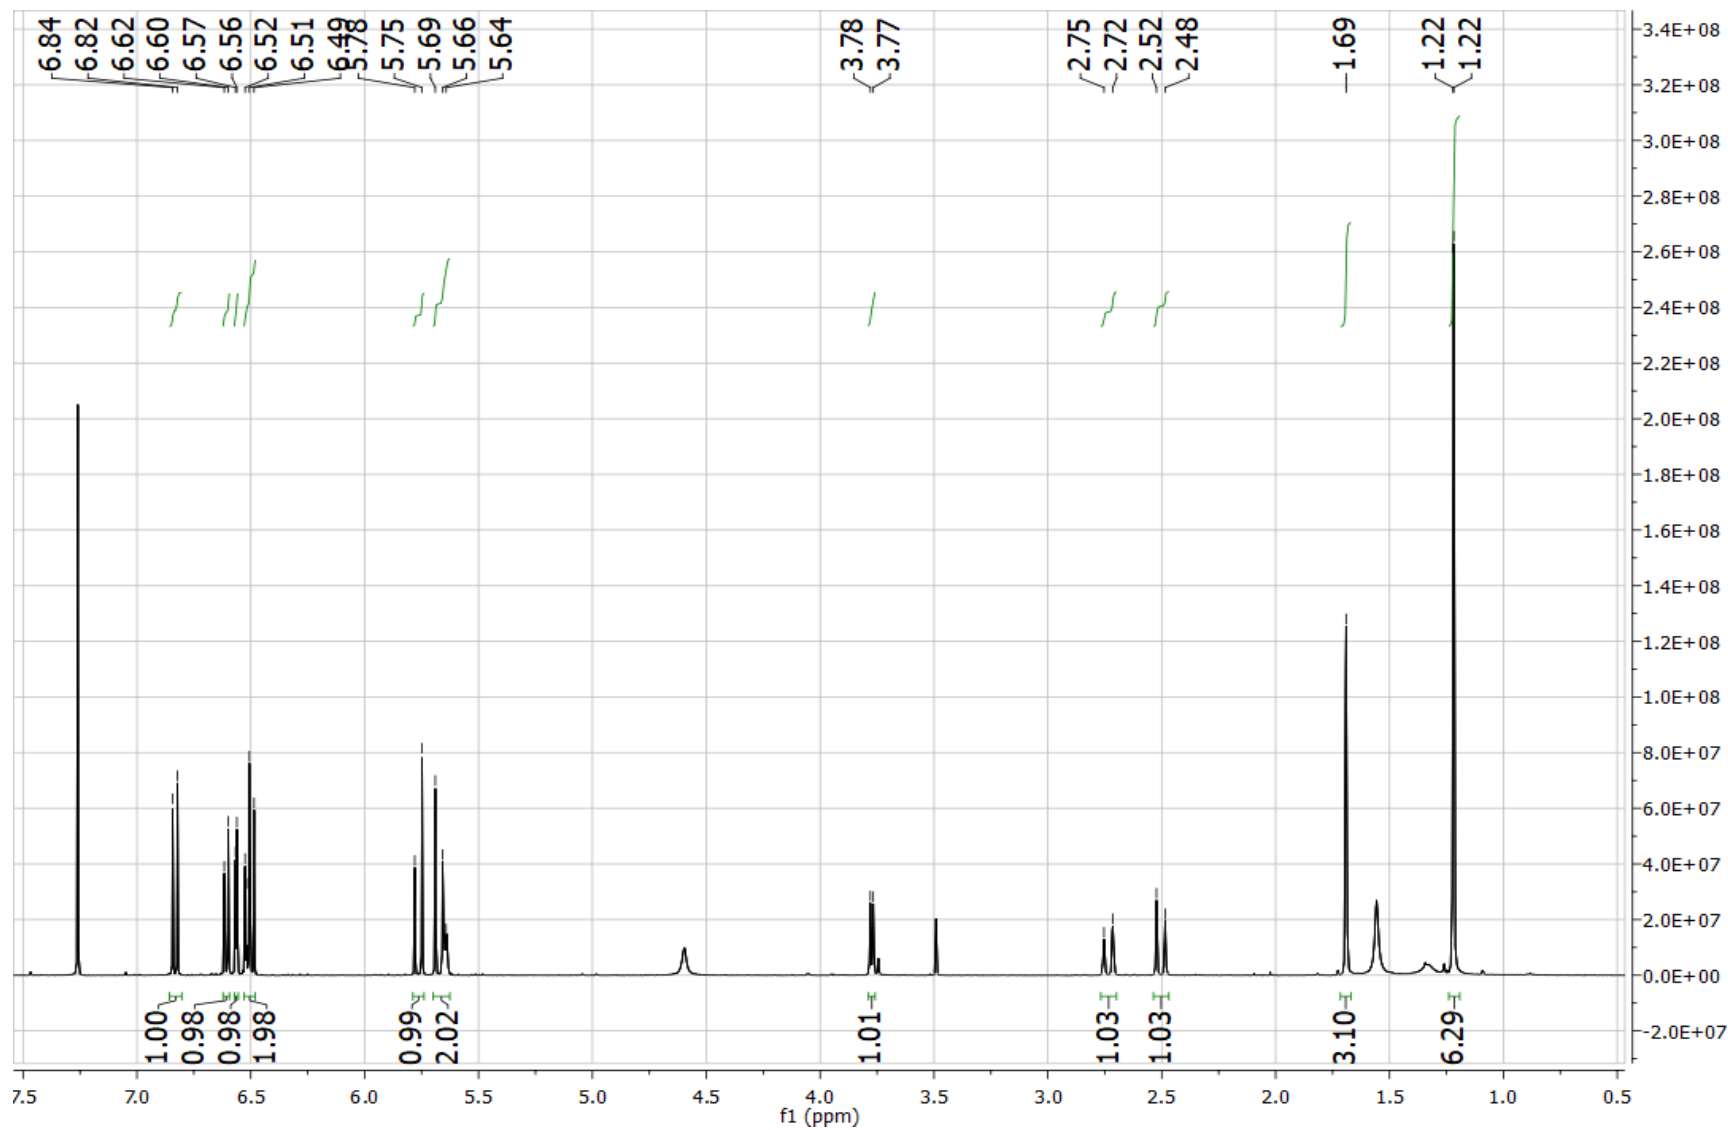

**Figure S1.**  $^1\text{H}$  NMR spectrum of allomicrophyllone (1) measured in  $\text{CDCl}_3$ .

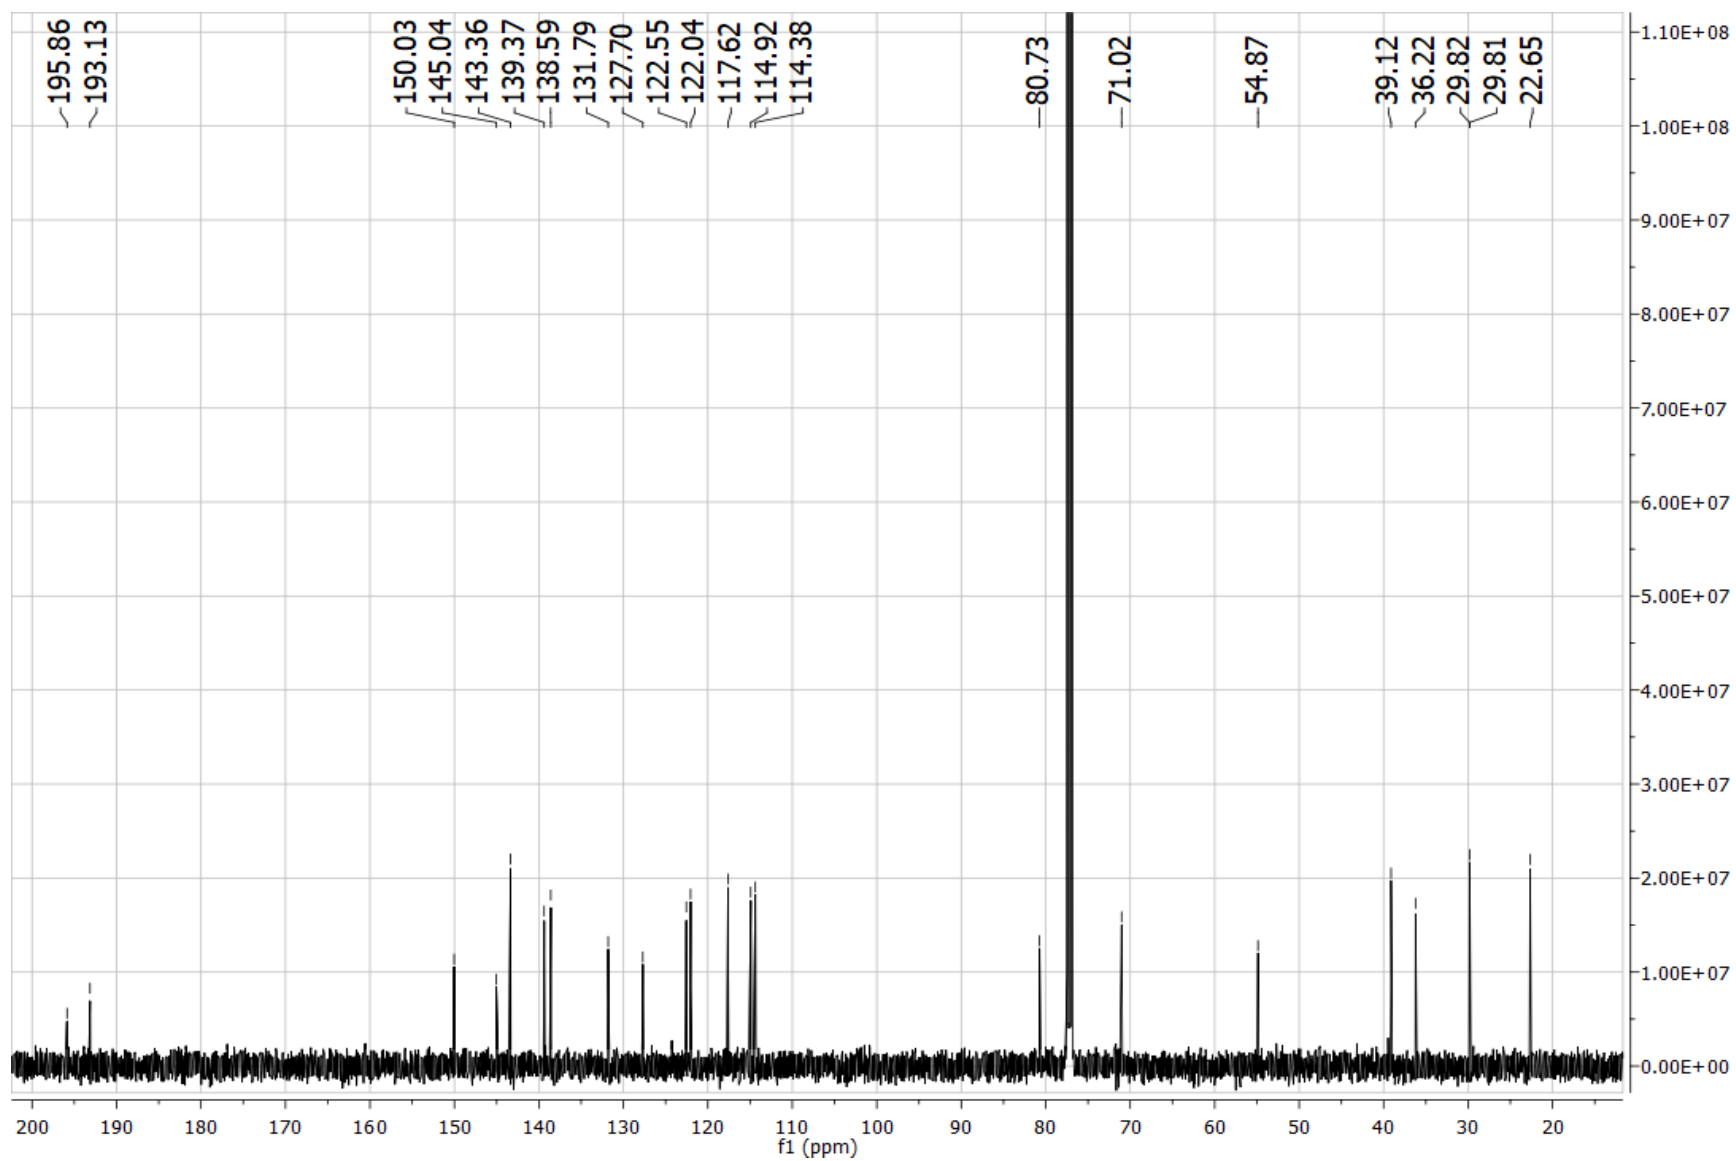

**Figure S2.**  $^{13}\text{C}$  NMR spectrum of allomicrophyllone (1) measured in  $\text{CDCl}_3$ .

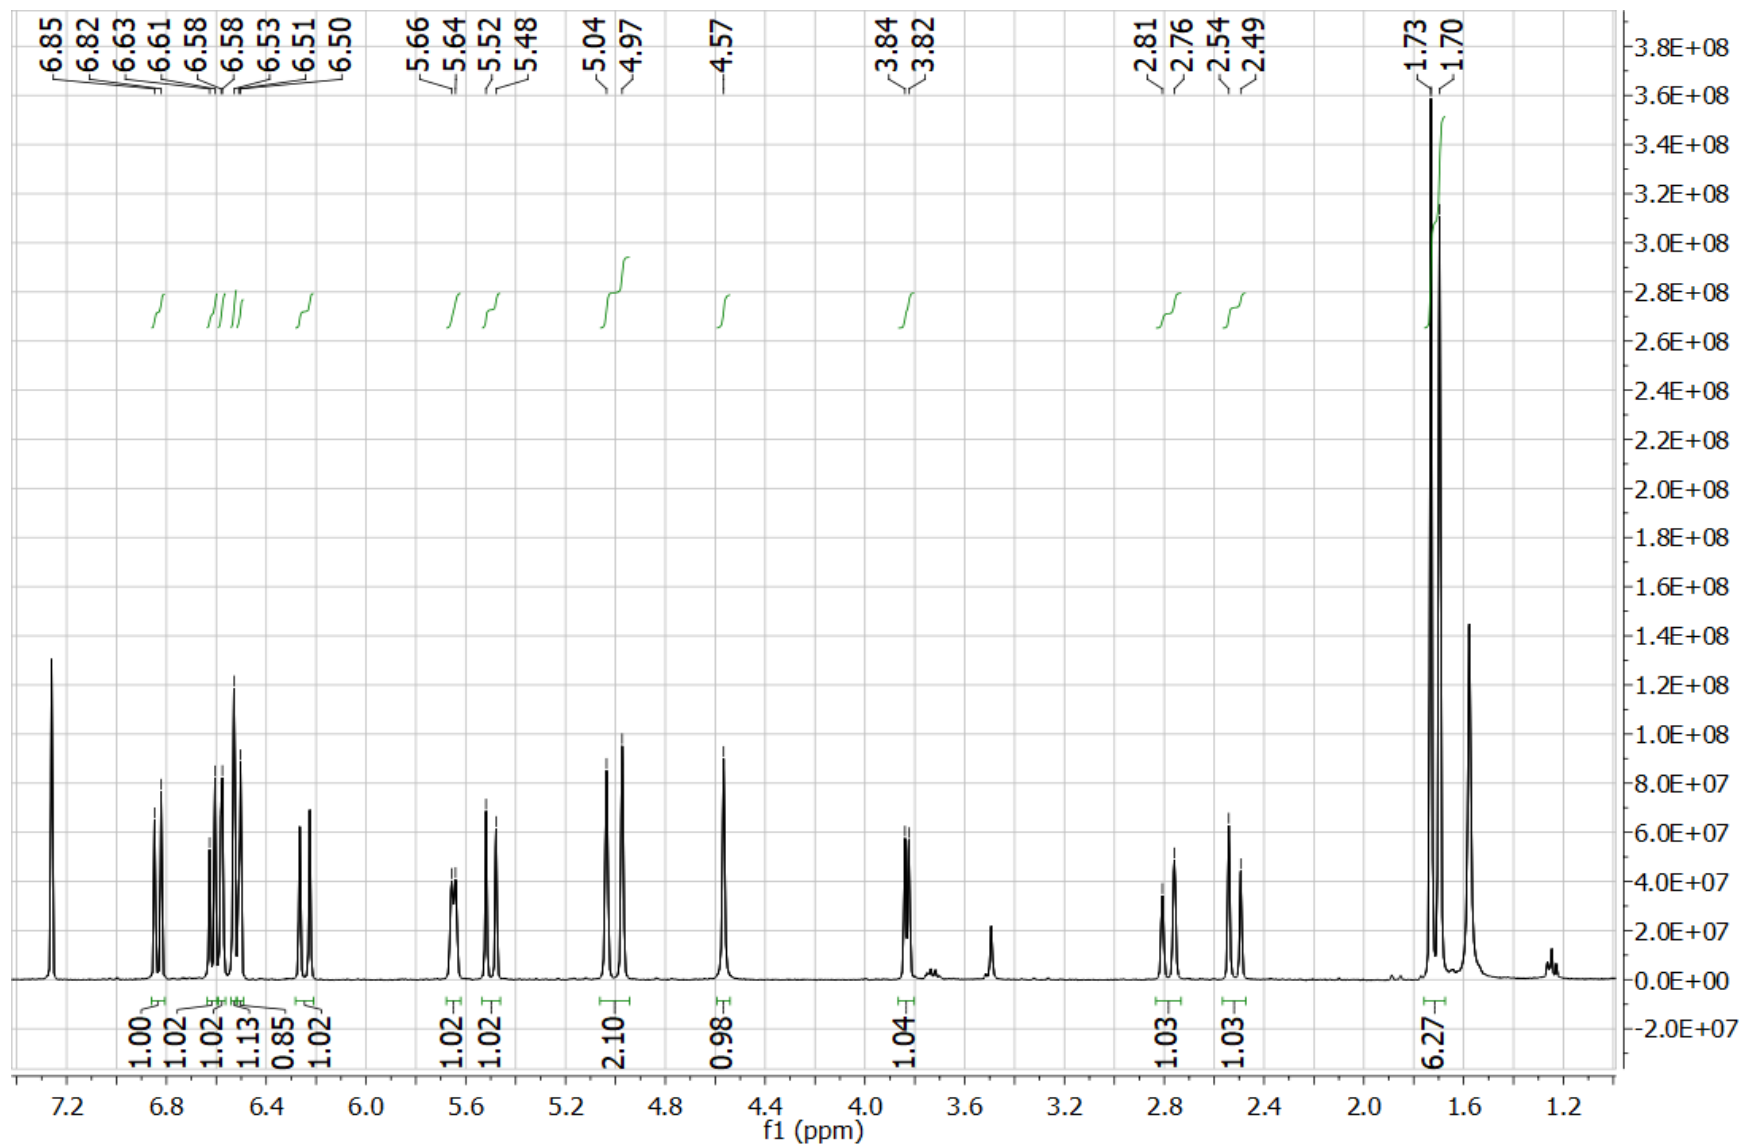

**Figure S3.**  $^1\text{H}$  NMR spectrum of ehretiquinone (2) measured in  $\text{CDCl}_3$ .

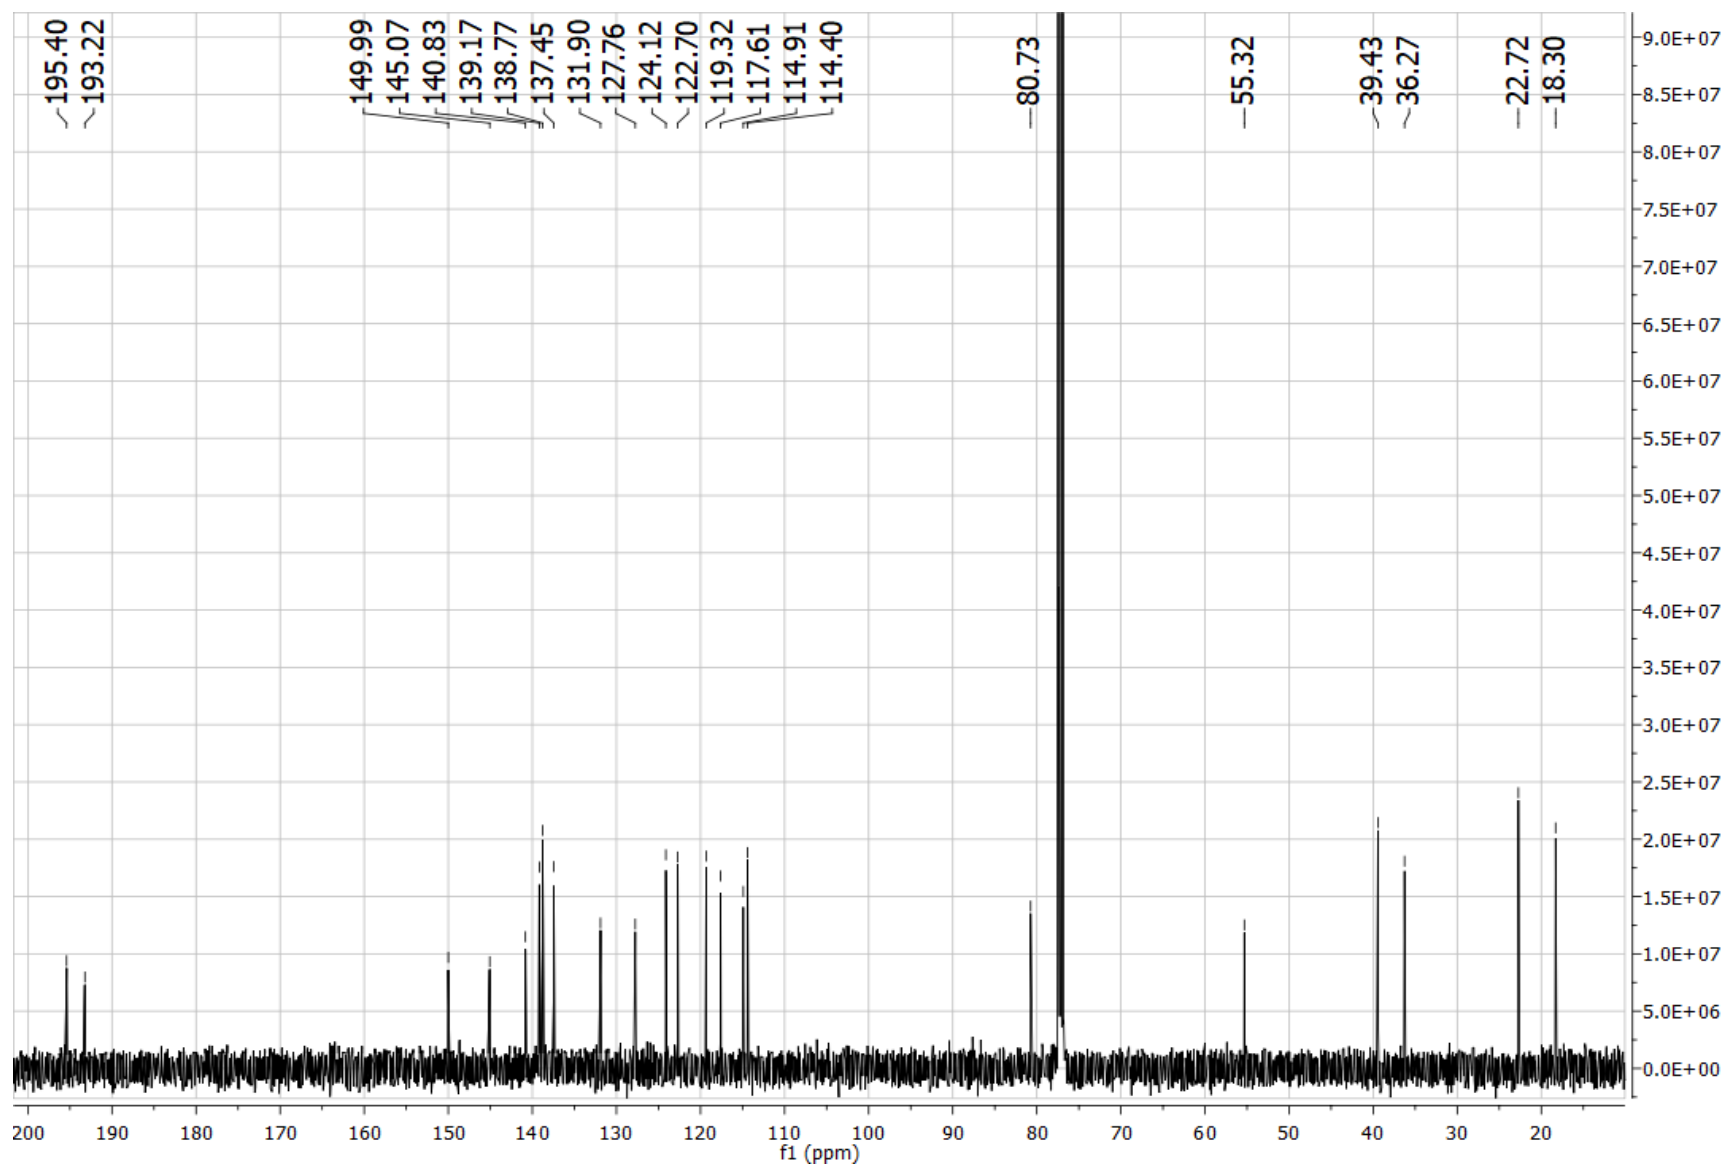

**Figure S4.**  $^{13}\text{C}$  NMR spectrum of ehretiquinone (2) measured in  $\text{CDCl}_3$ .

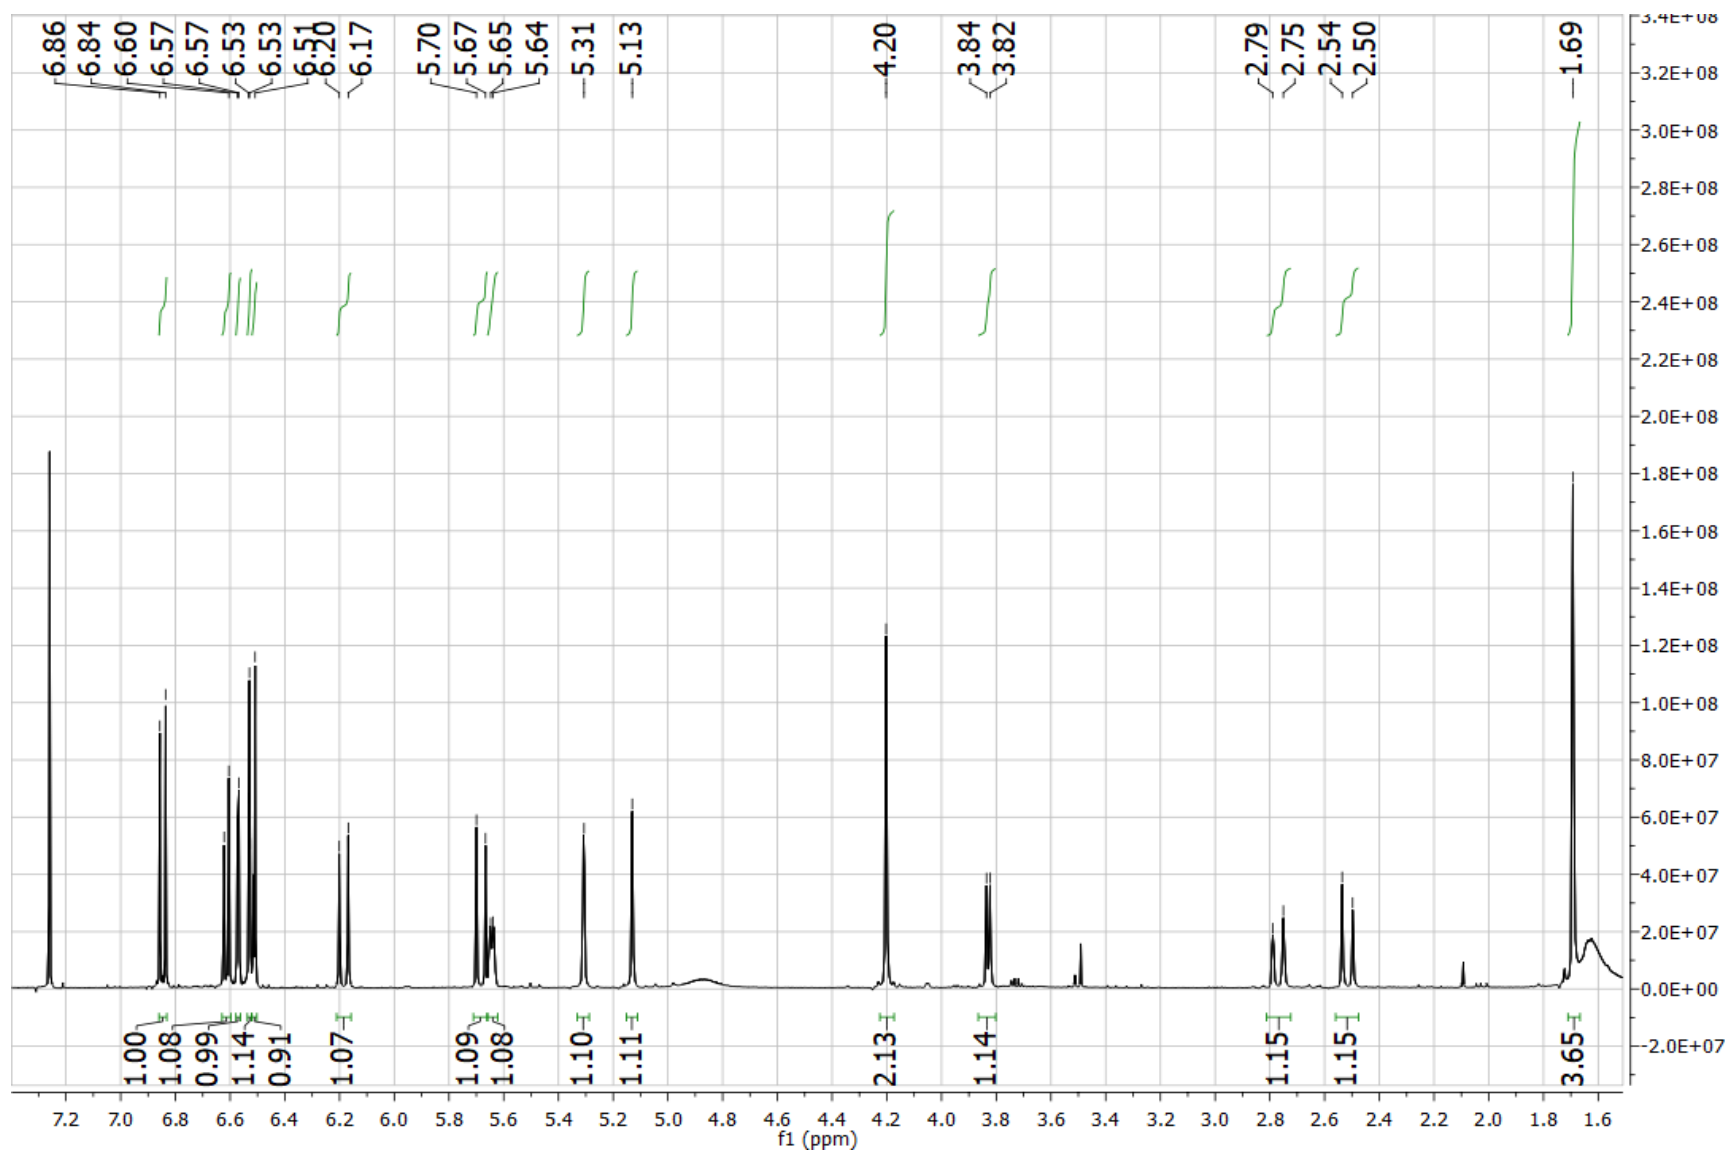

Figure S5.  $^1\text{H}$  NMR spectrum of ehretiquinone B (**3**) measured in  $\text{CDCl}_3$ .

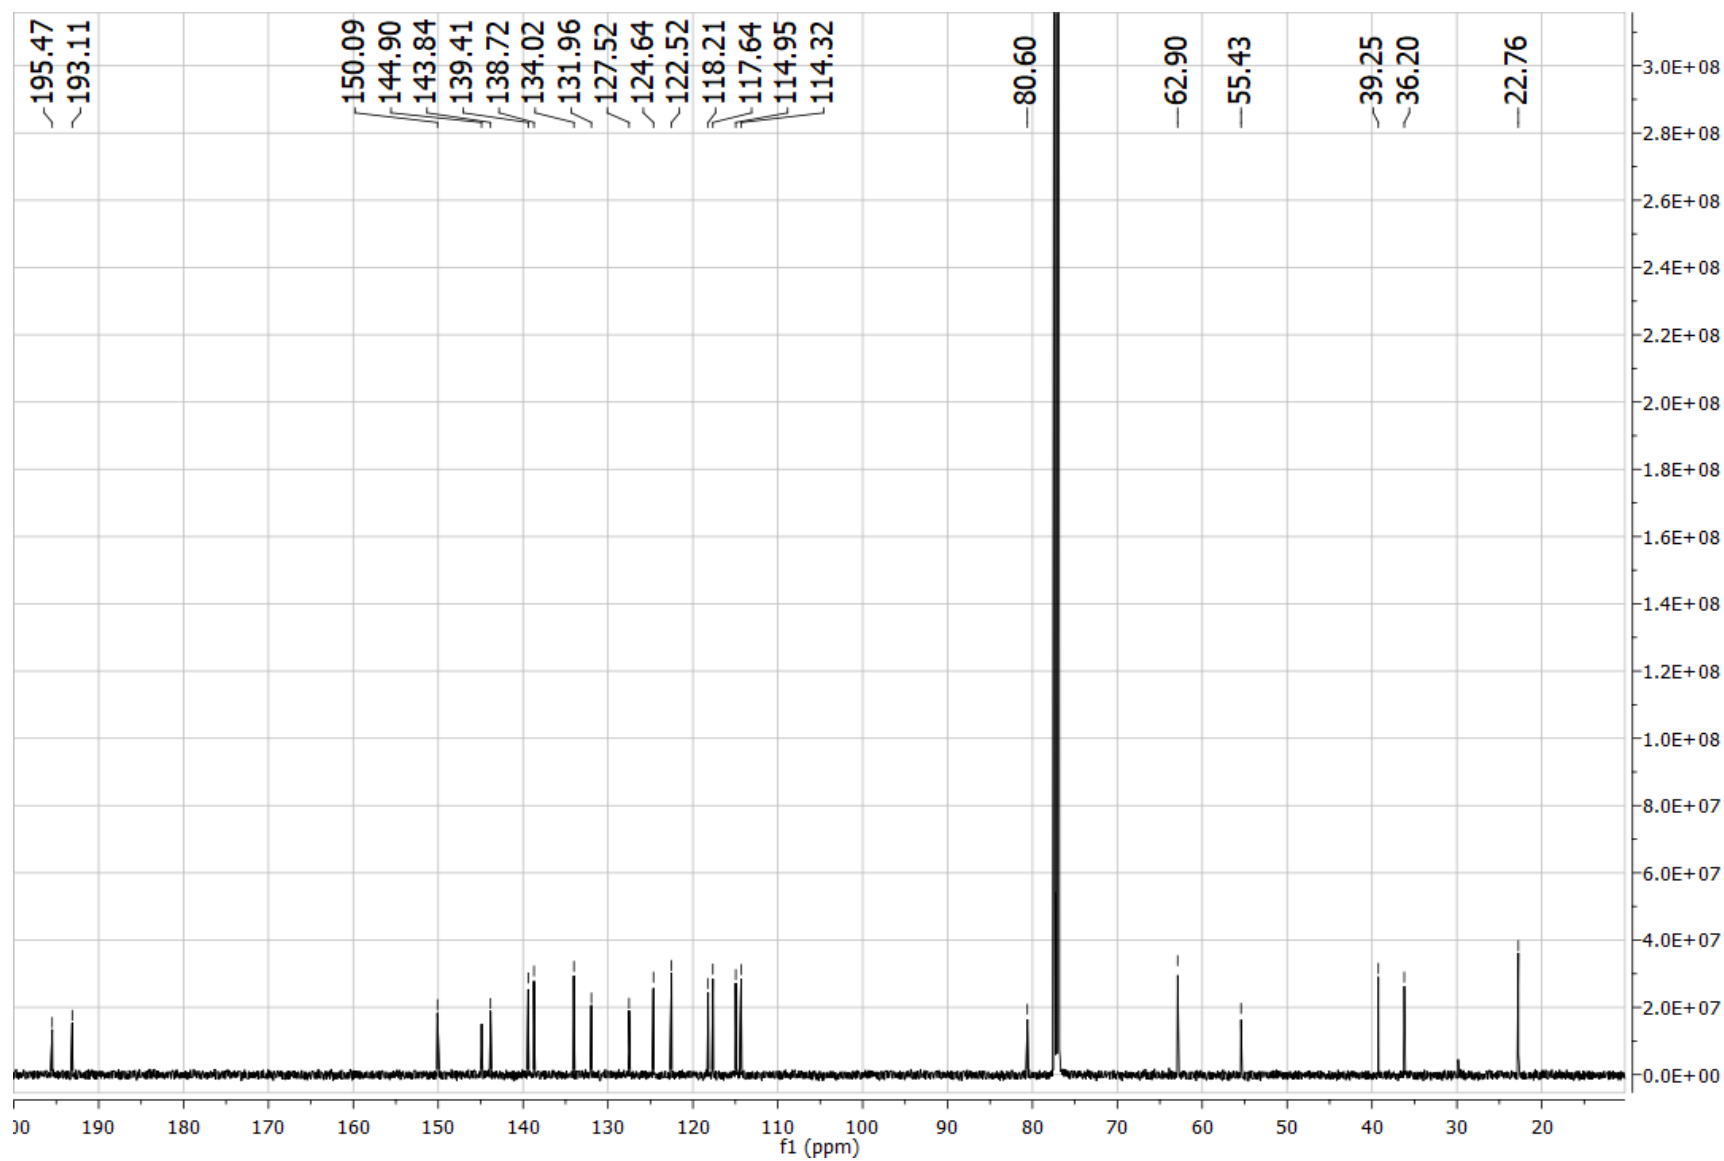

**Figure S6.**  $^{13}\text{C}$  NMR spectrum of ehretiquinone B (**3**) measured in  $\text{CDCl}_3$ .



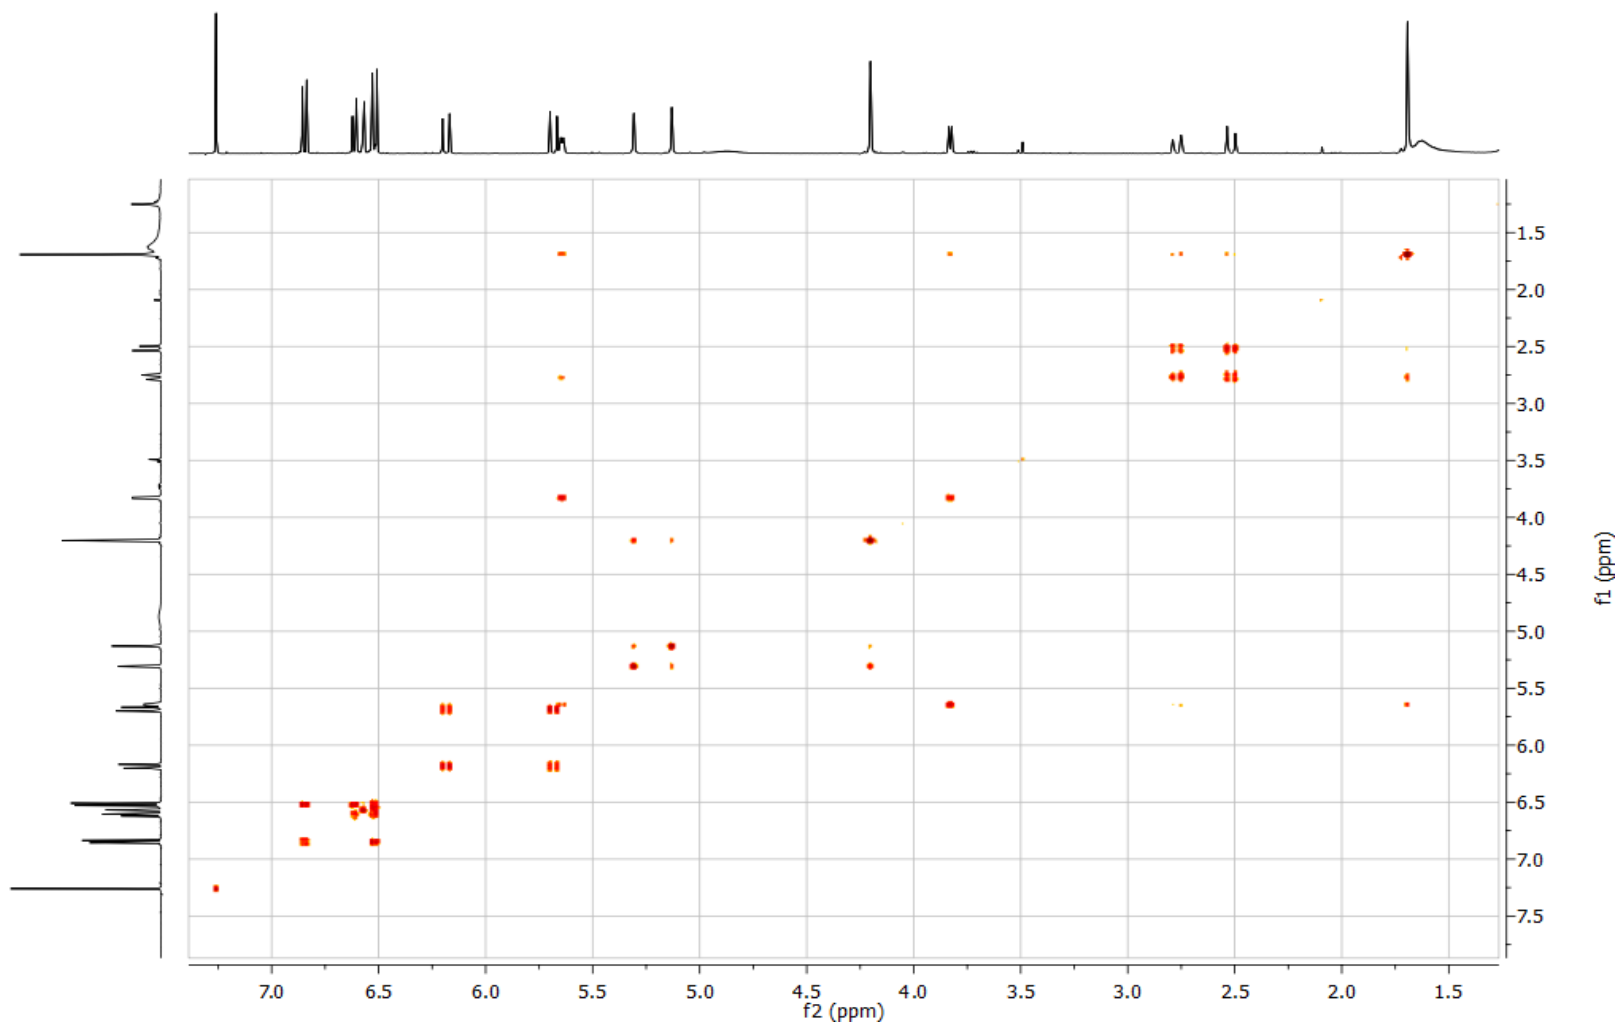

**Figure S7.**  $^1\text{H}$ - $^1\text{H}$  COSY spectrum of ehretiquinone B (**3**) measured in  $\text{CDCl}_3$ .

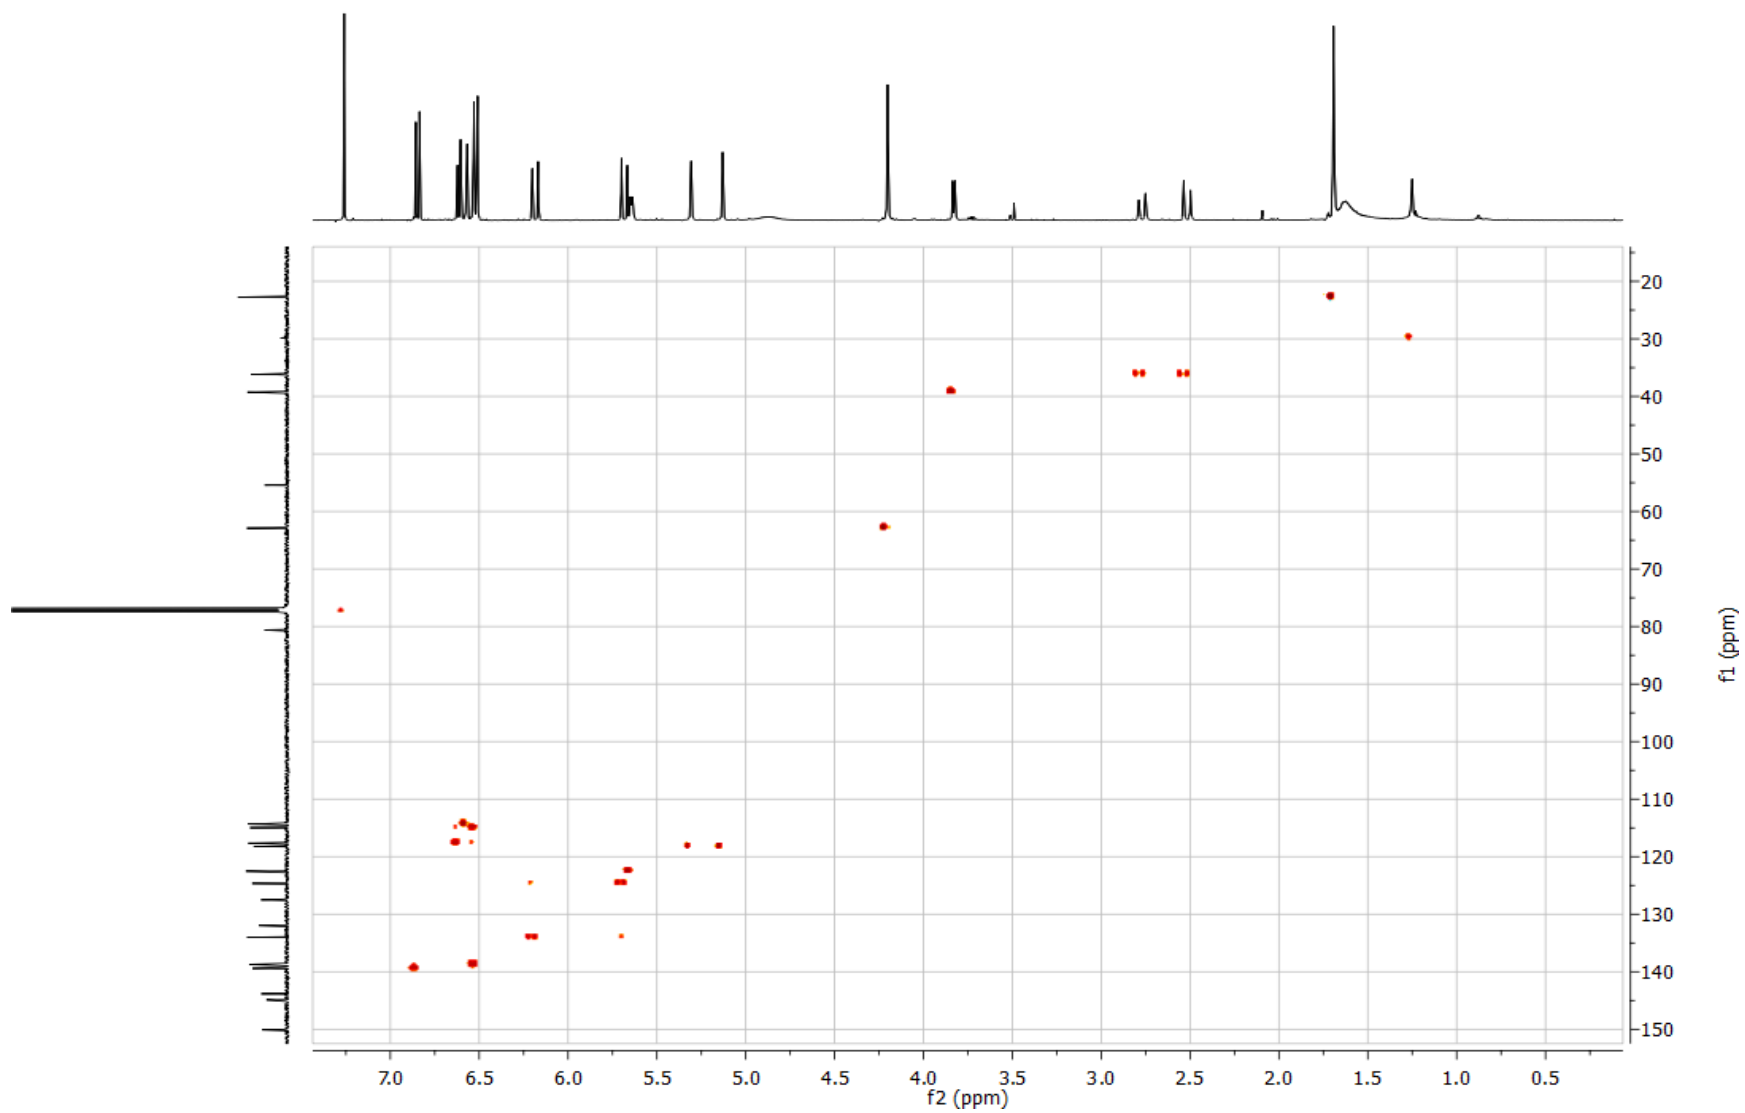

**Figure S8.** HSQC spectrum of ehretiquinone B (**3**) measured in CDCl<sub>3</sub>.

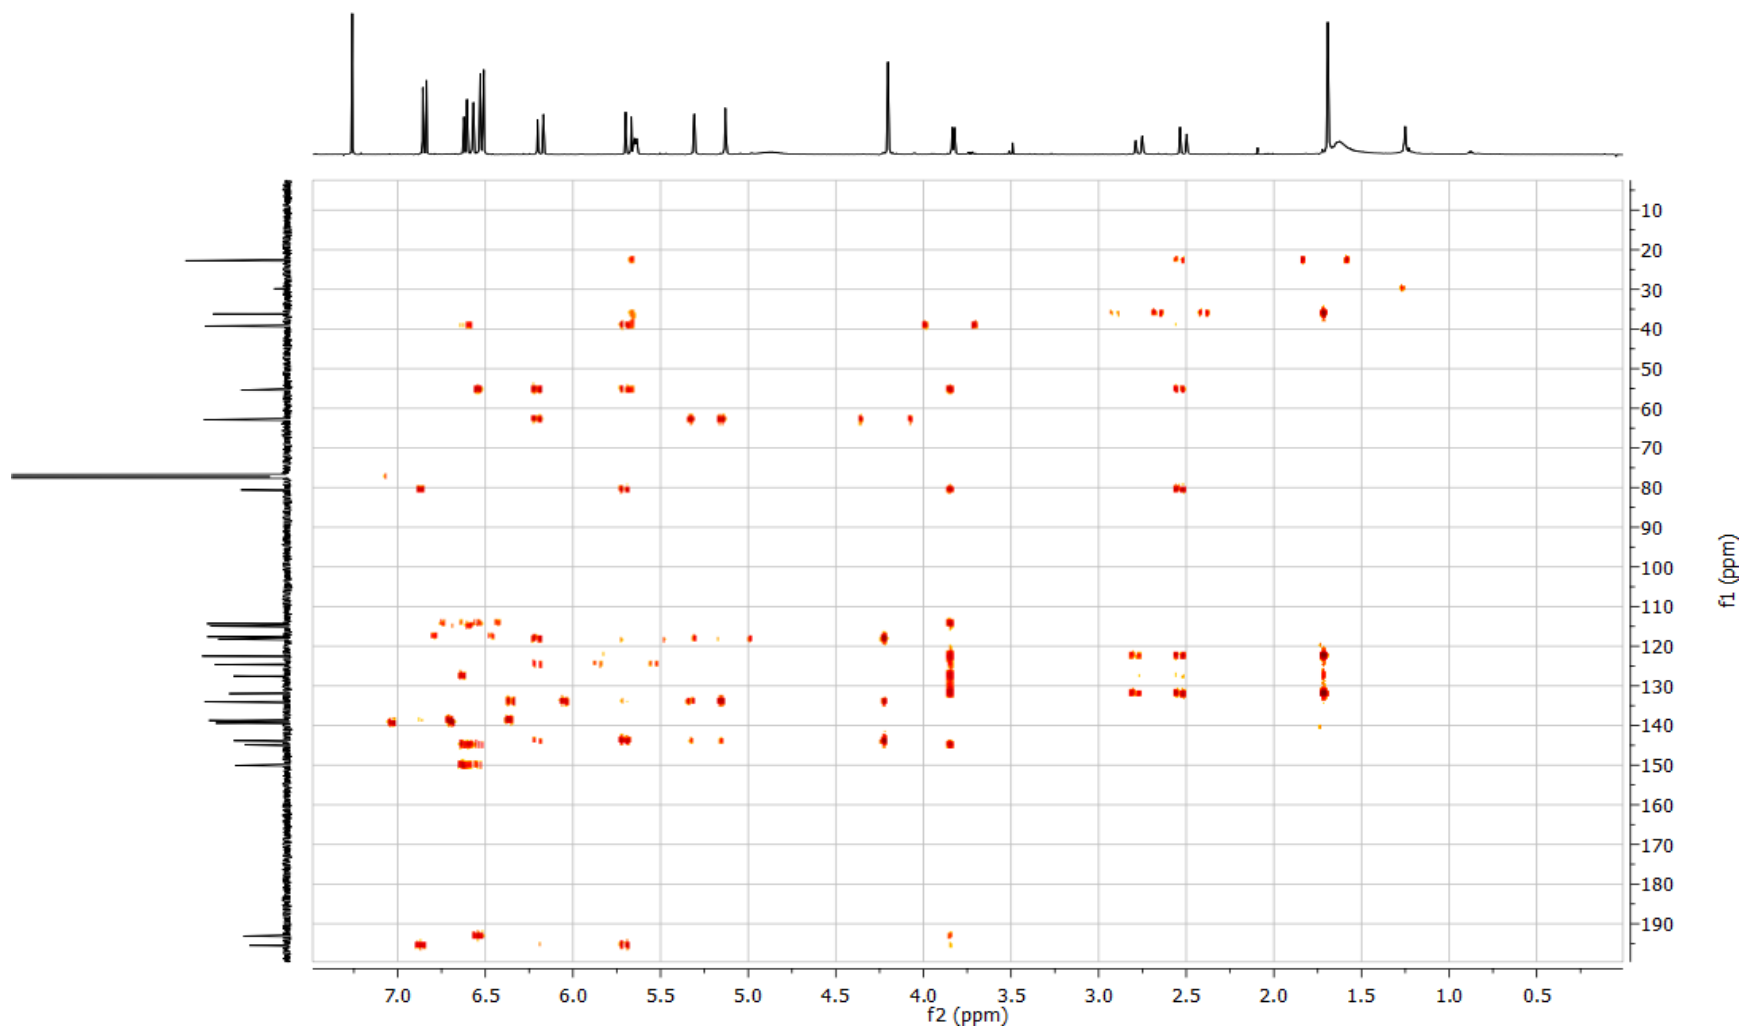

**Figure S9.** HMBC spectrum of ehretiquinone B (**3**) measured in CDCl<sub>3</sub>.

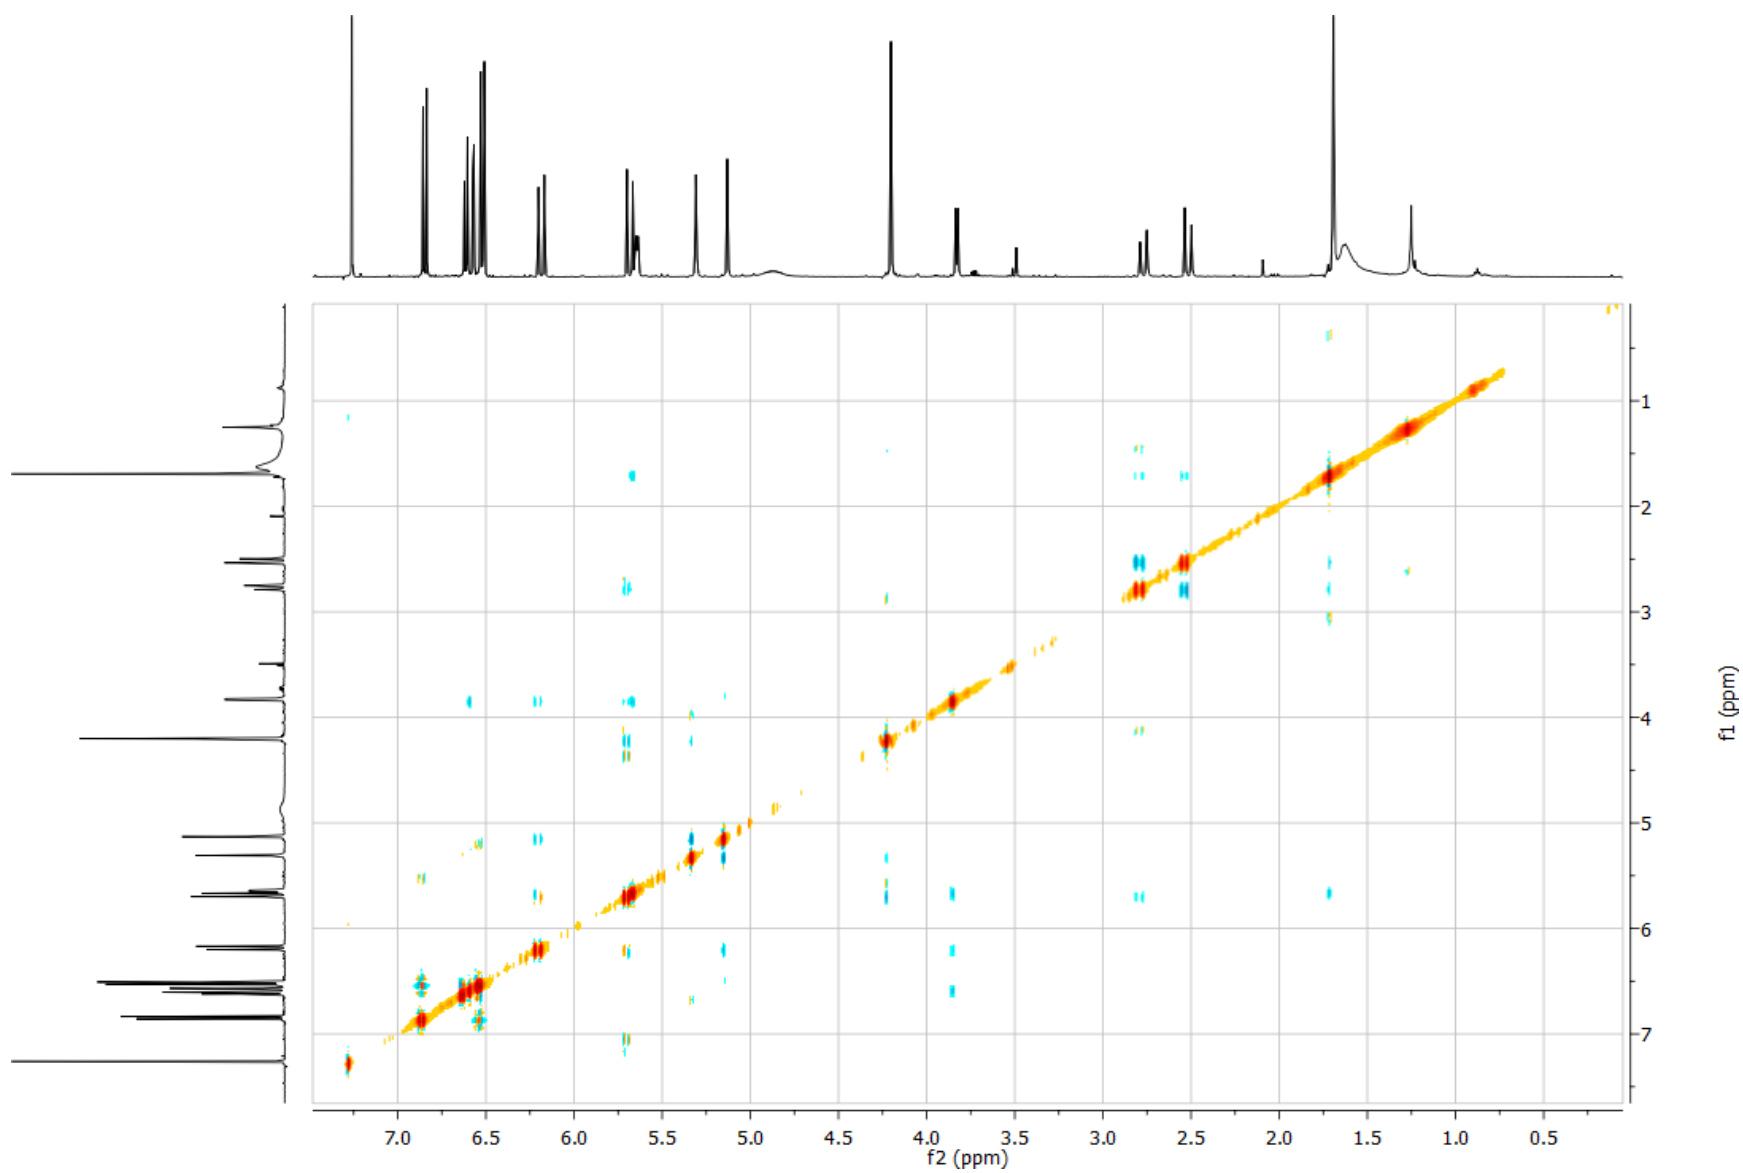

**Figure S10.** NOESY spectrum of ehretiquinone B (**3**) measured in CDCl<sub>3</sub>.

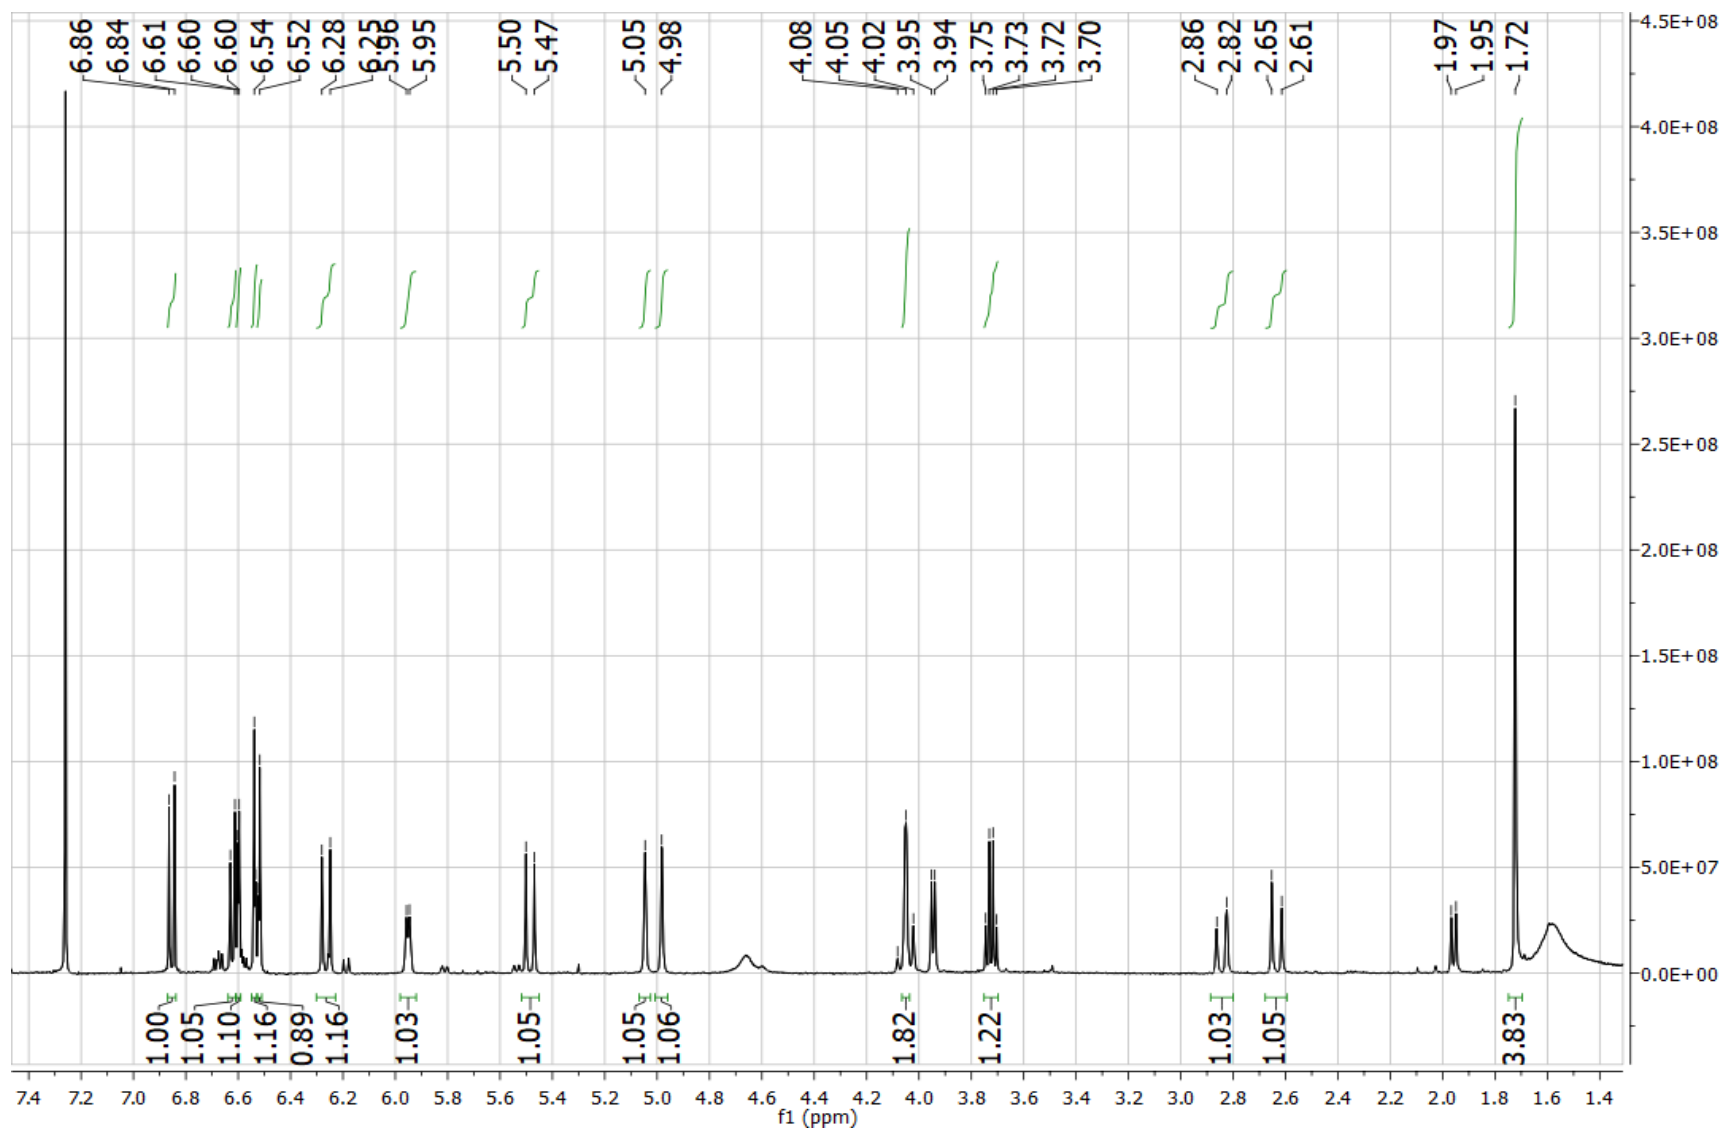

**Figure S11.**  $^1\text{H}$  NMR spectrum of ehretiquinone C (4) measured in  $\text{CDCl}_3$ .

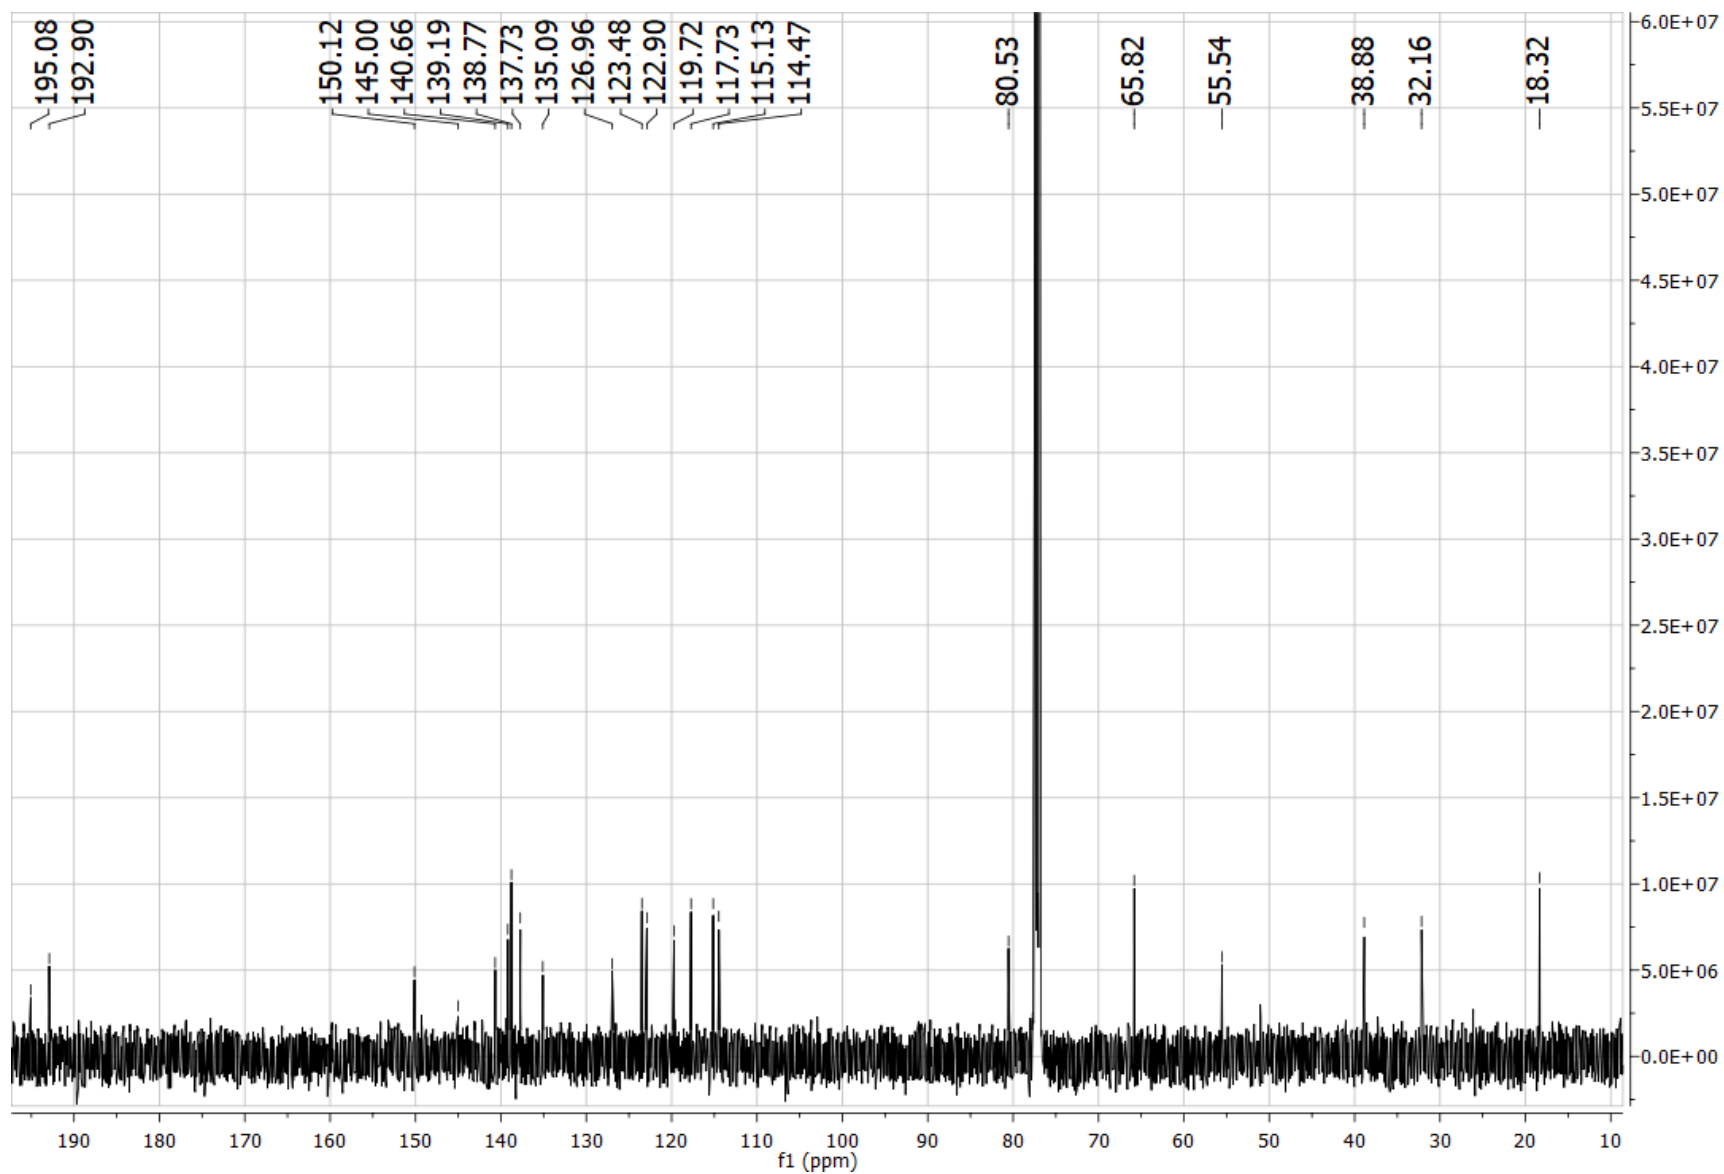

**Figure S12.**  $^{13}\text{C}$  NMR spectrum of ehretiquinone C (4) measured in  $\text{CDCl}_3$ .

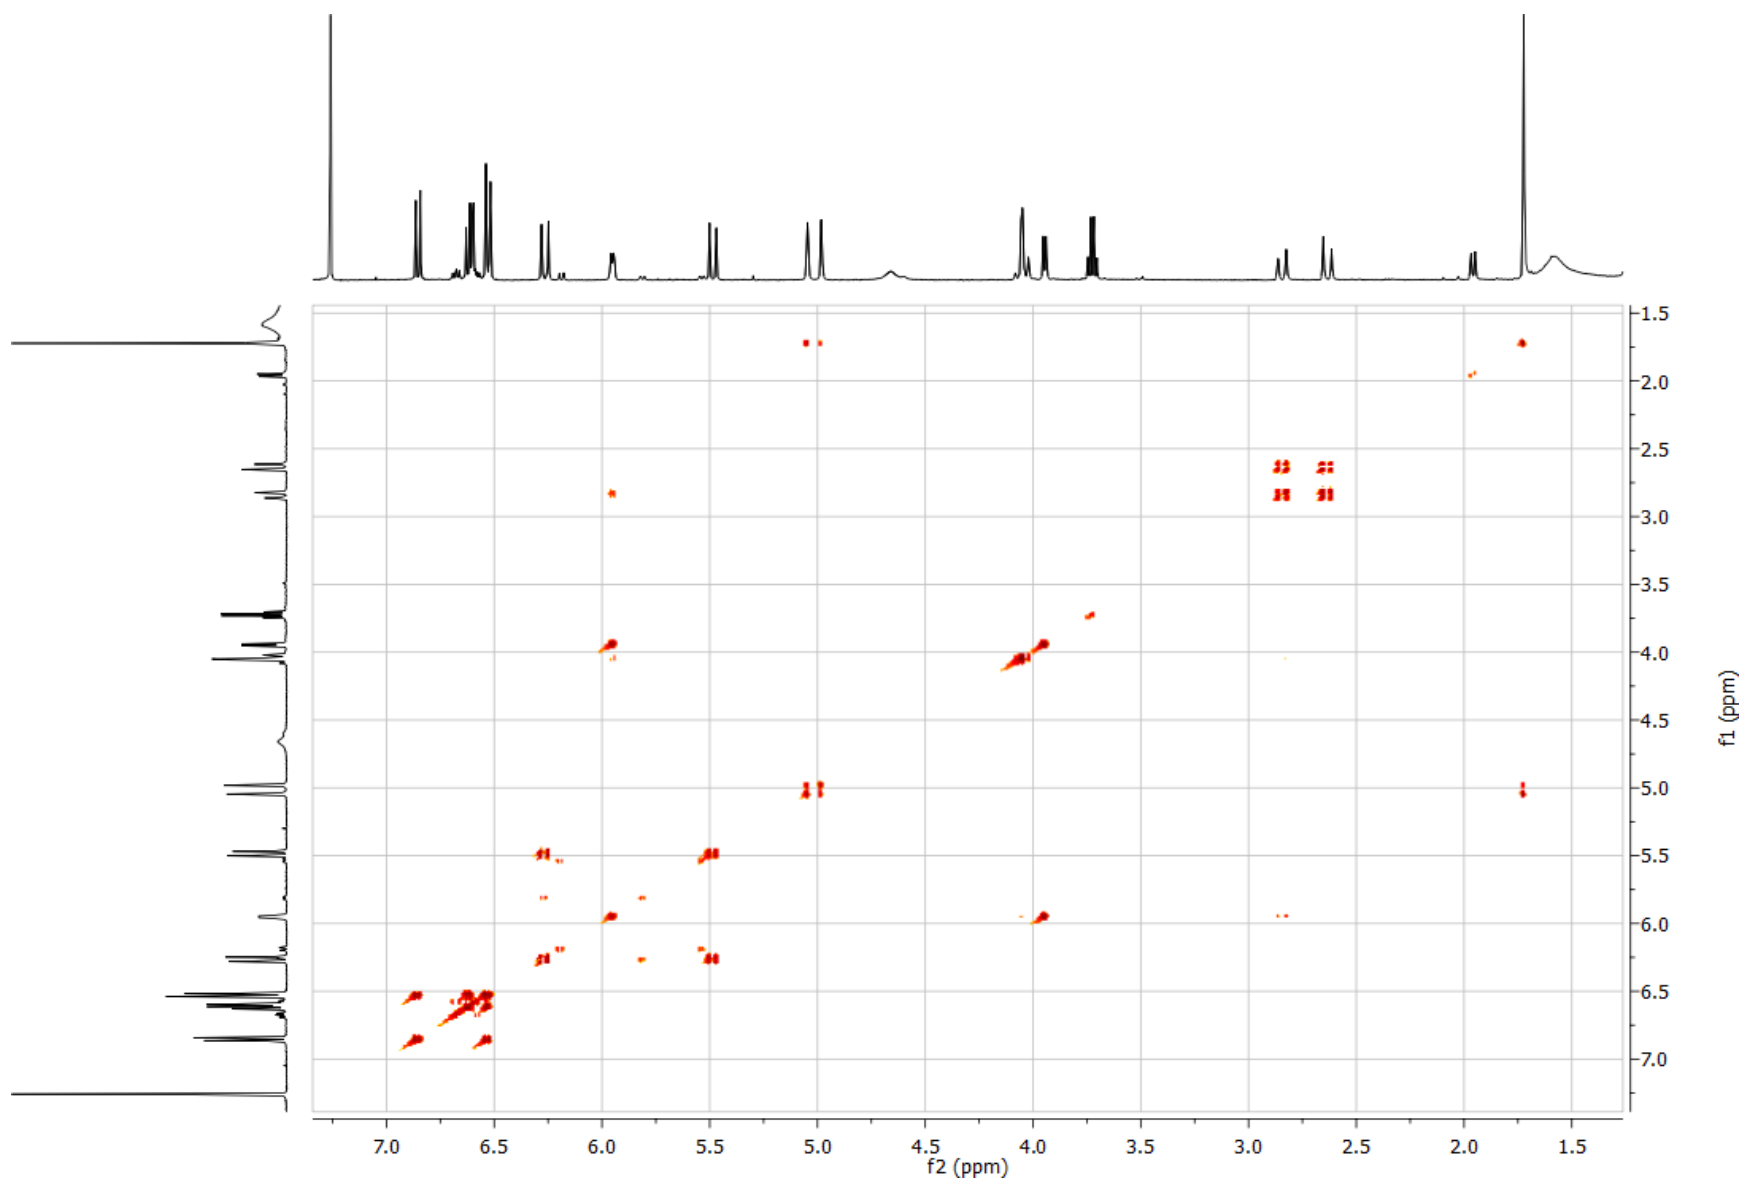

**Figure S13.**  $^1\text{H}$ - $^1\text{H}$  COSY spectrum of ehretiquinone C (**4**) measured in  $\text{CDCl}_3$ .

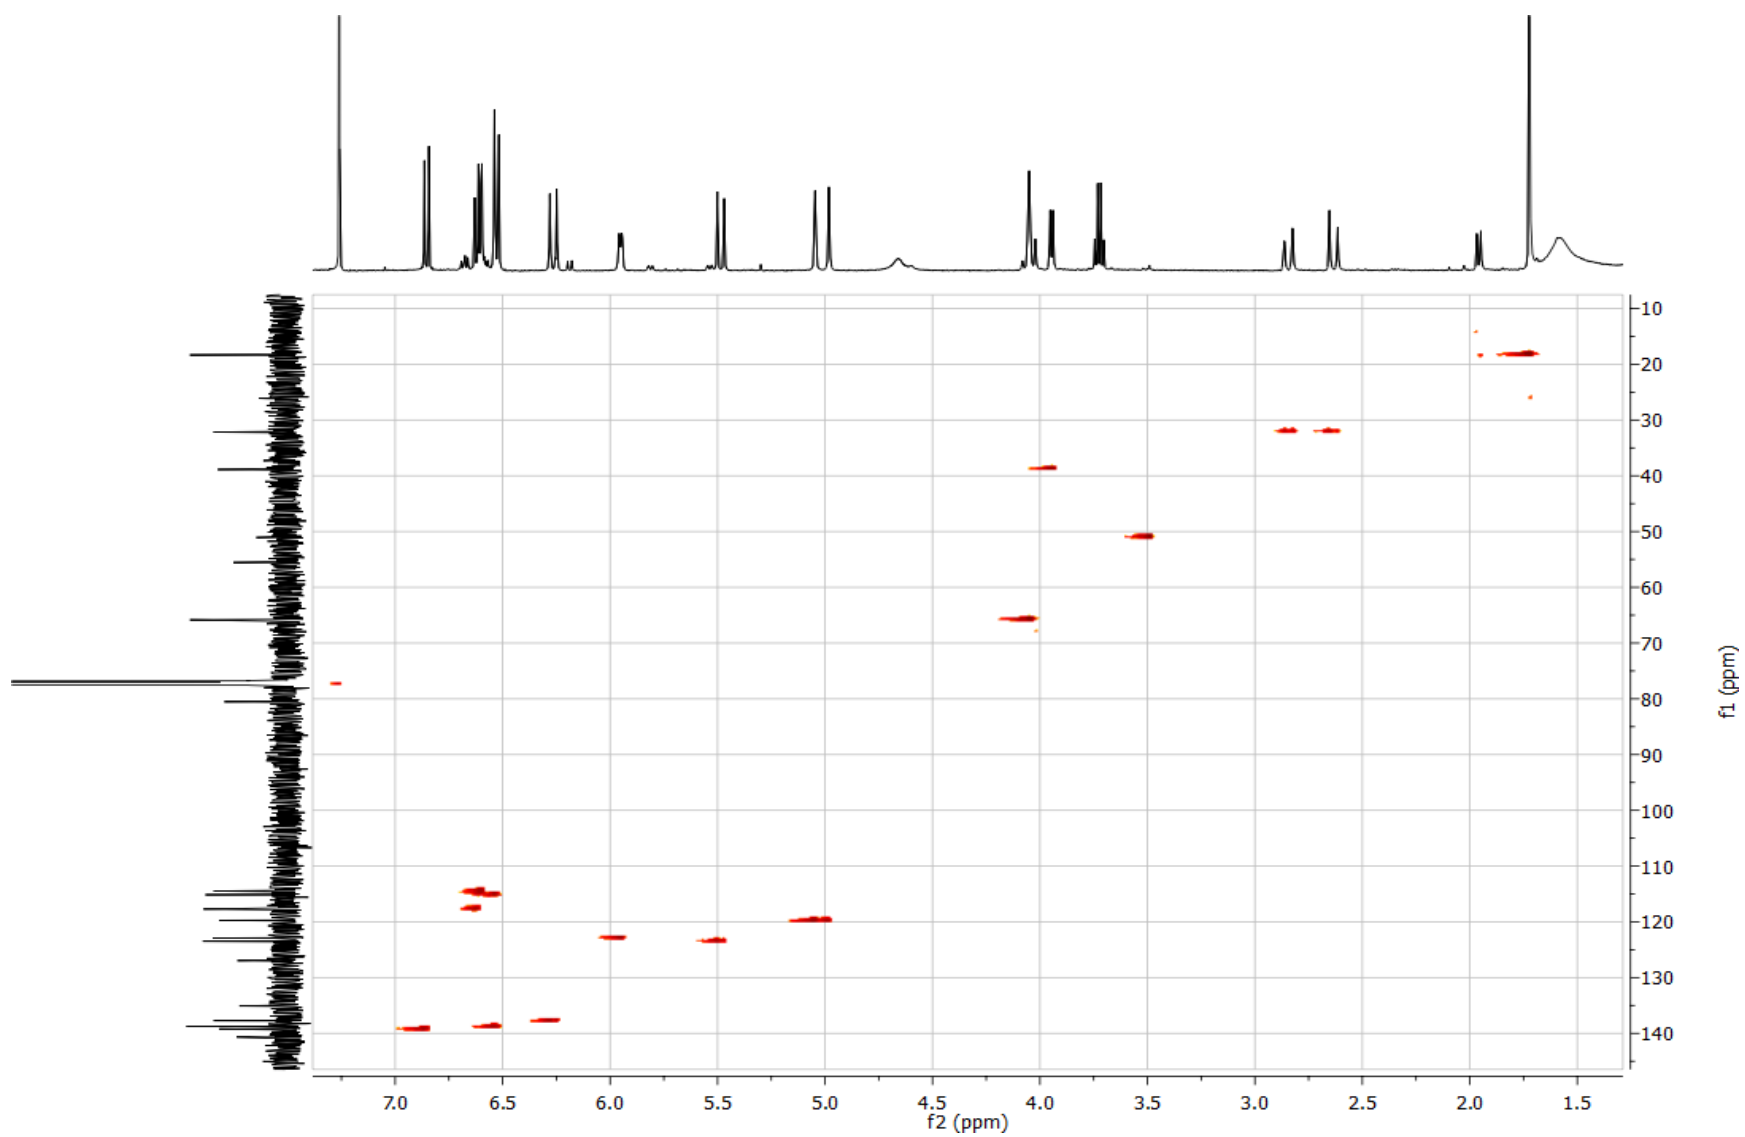

**Figure S14.** HSQC spectrum of ehretiquinone C (**4**) measured in CDCl<sub>3</sub>.



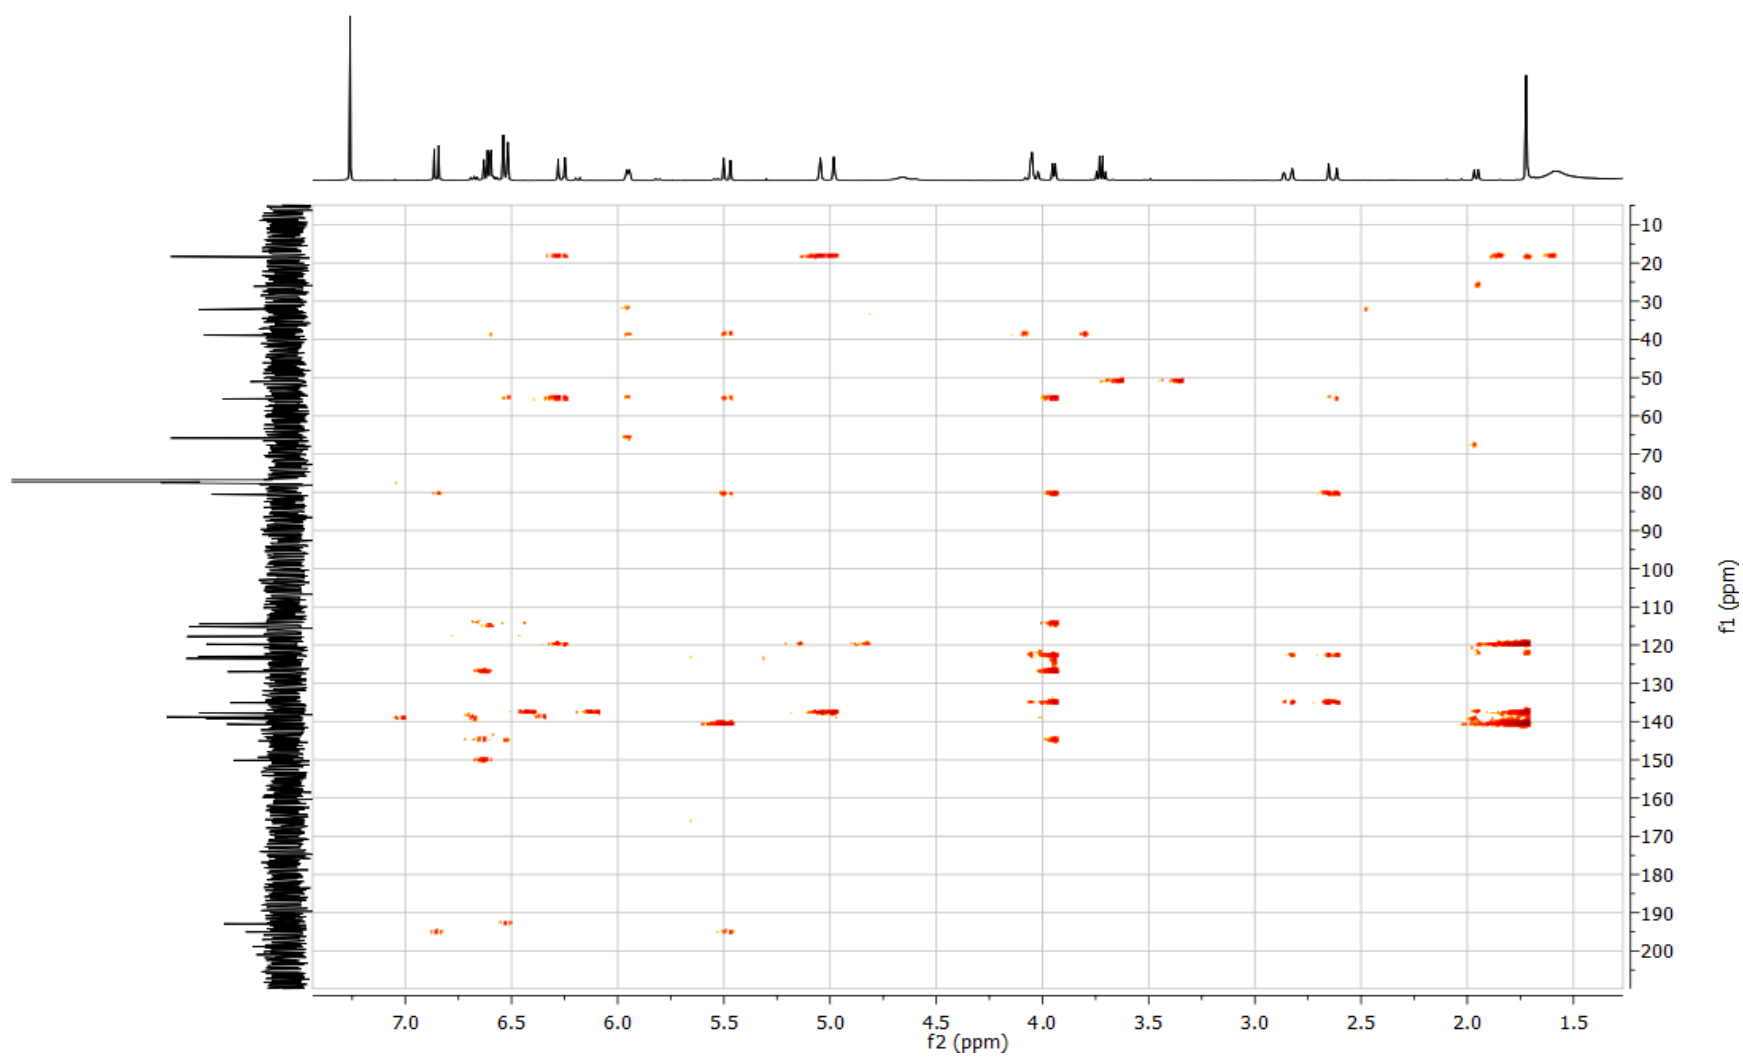

**Figure S15.** HMBC spectrum of ehretiquinone C (**4**) measured in CDCl<sub>3</sub>.

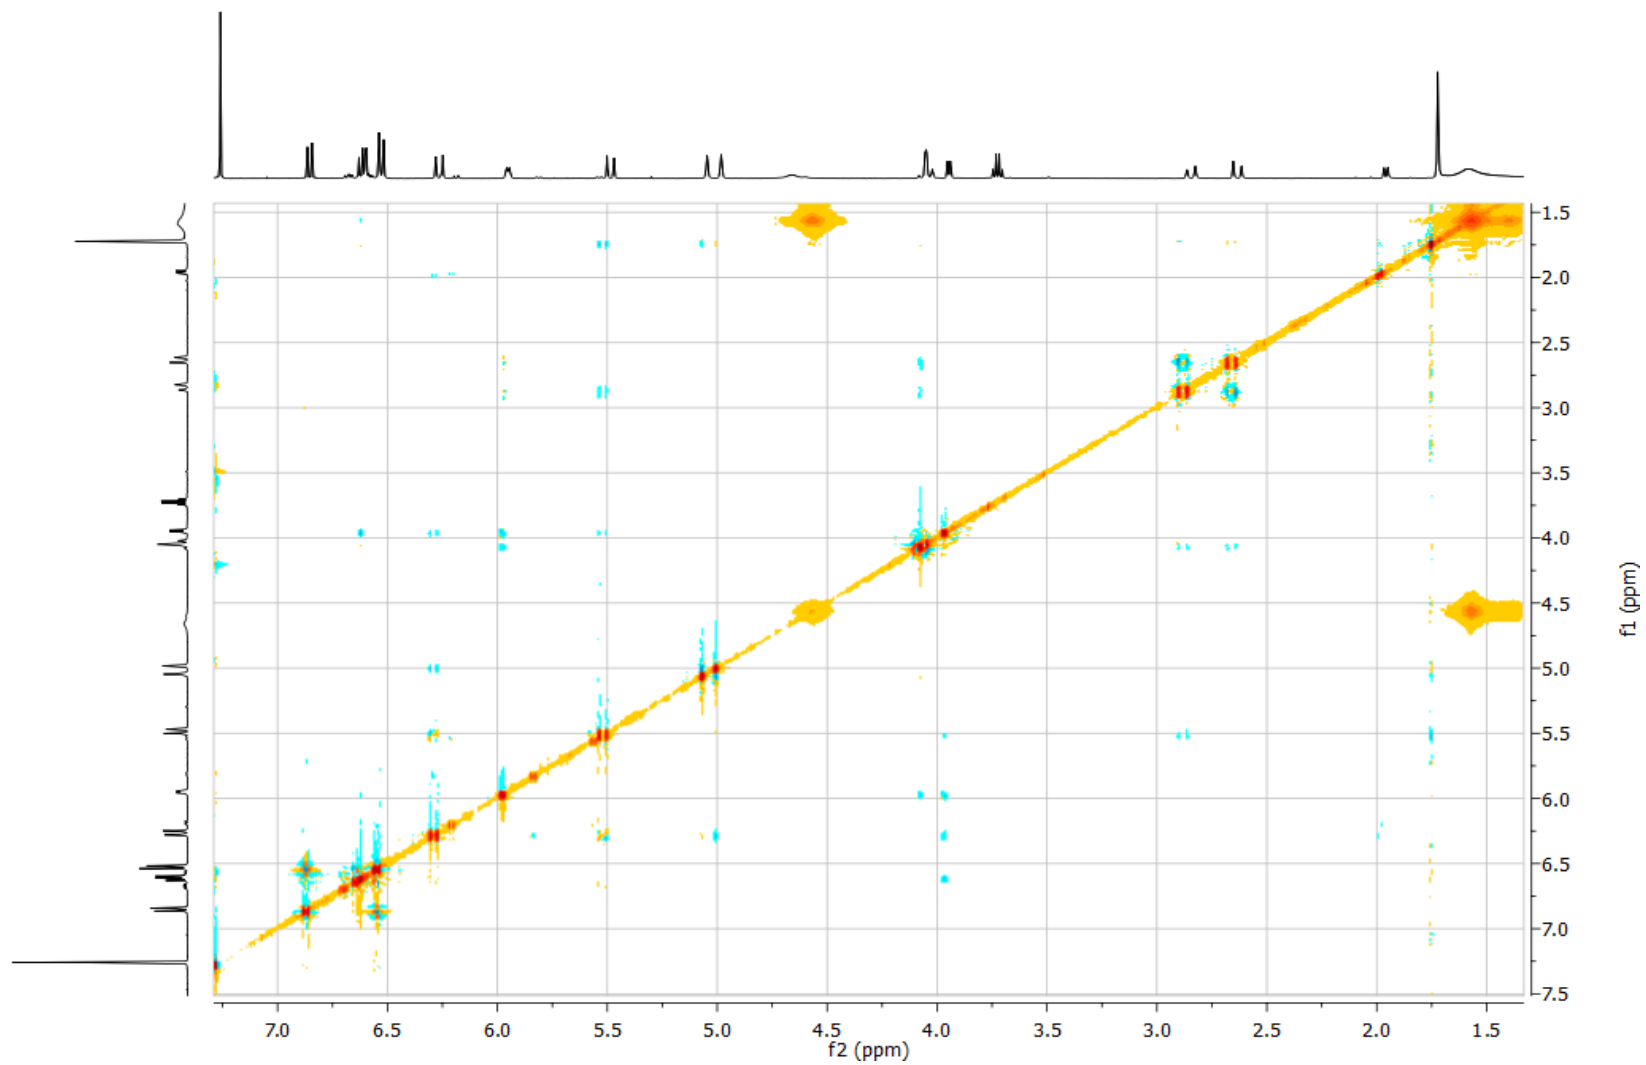

**Figure S16.** NOESY spectrum of ehretiquinone C (**4**) measured in CDCl<sub>3</sub>.

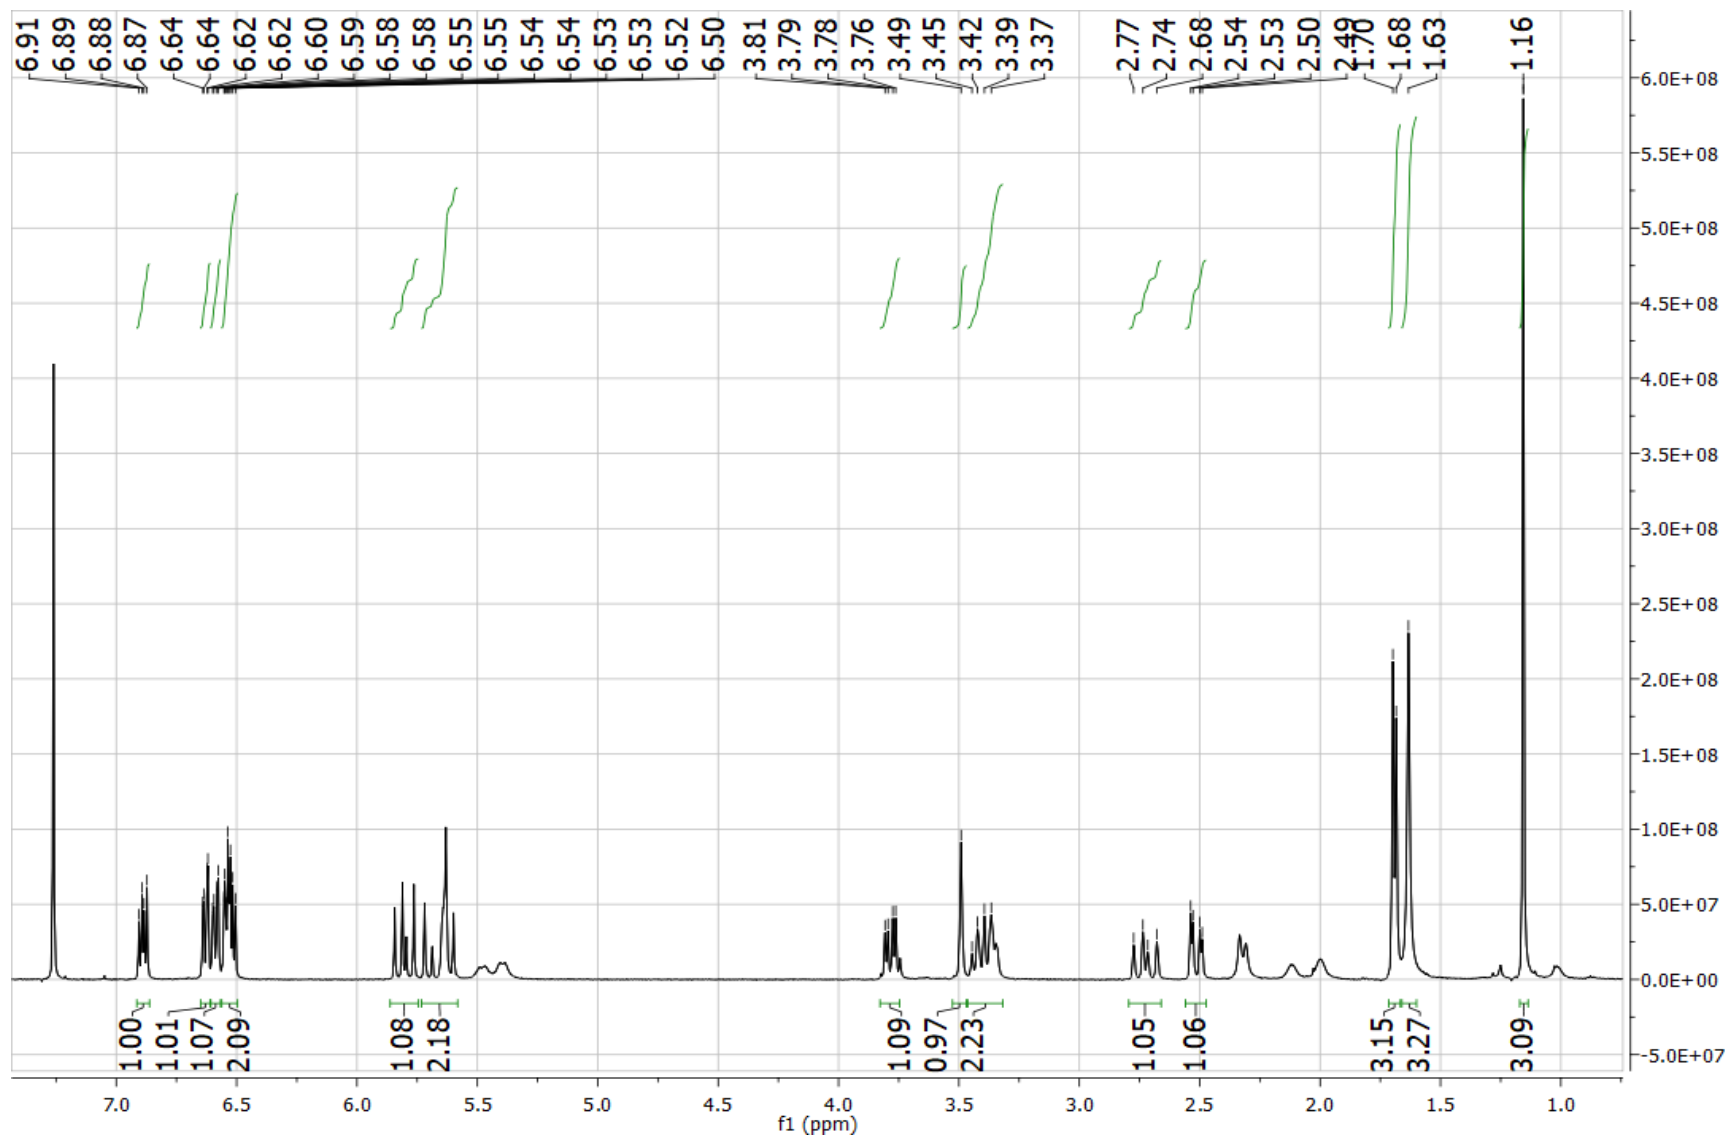

Figure S17.  $^1\text{H}$  NMR spectrum of ehretiquinone D (**5**) measured in  $\text{CDCl}_3$ .

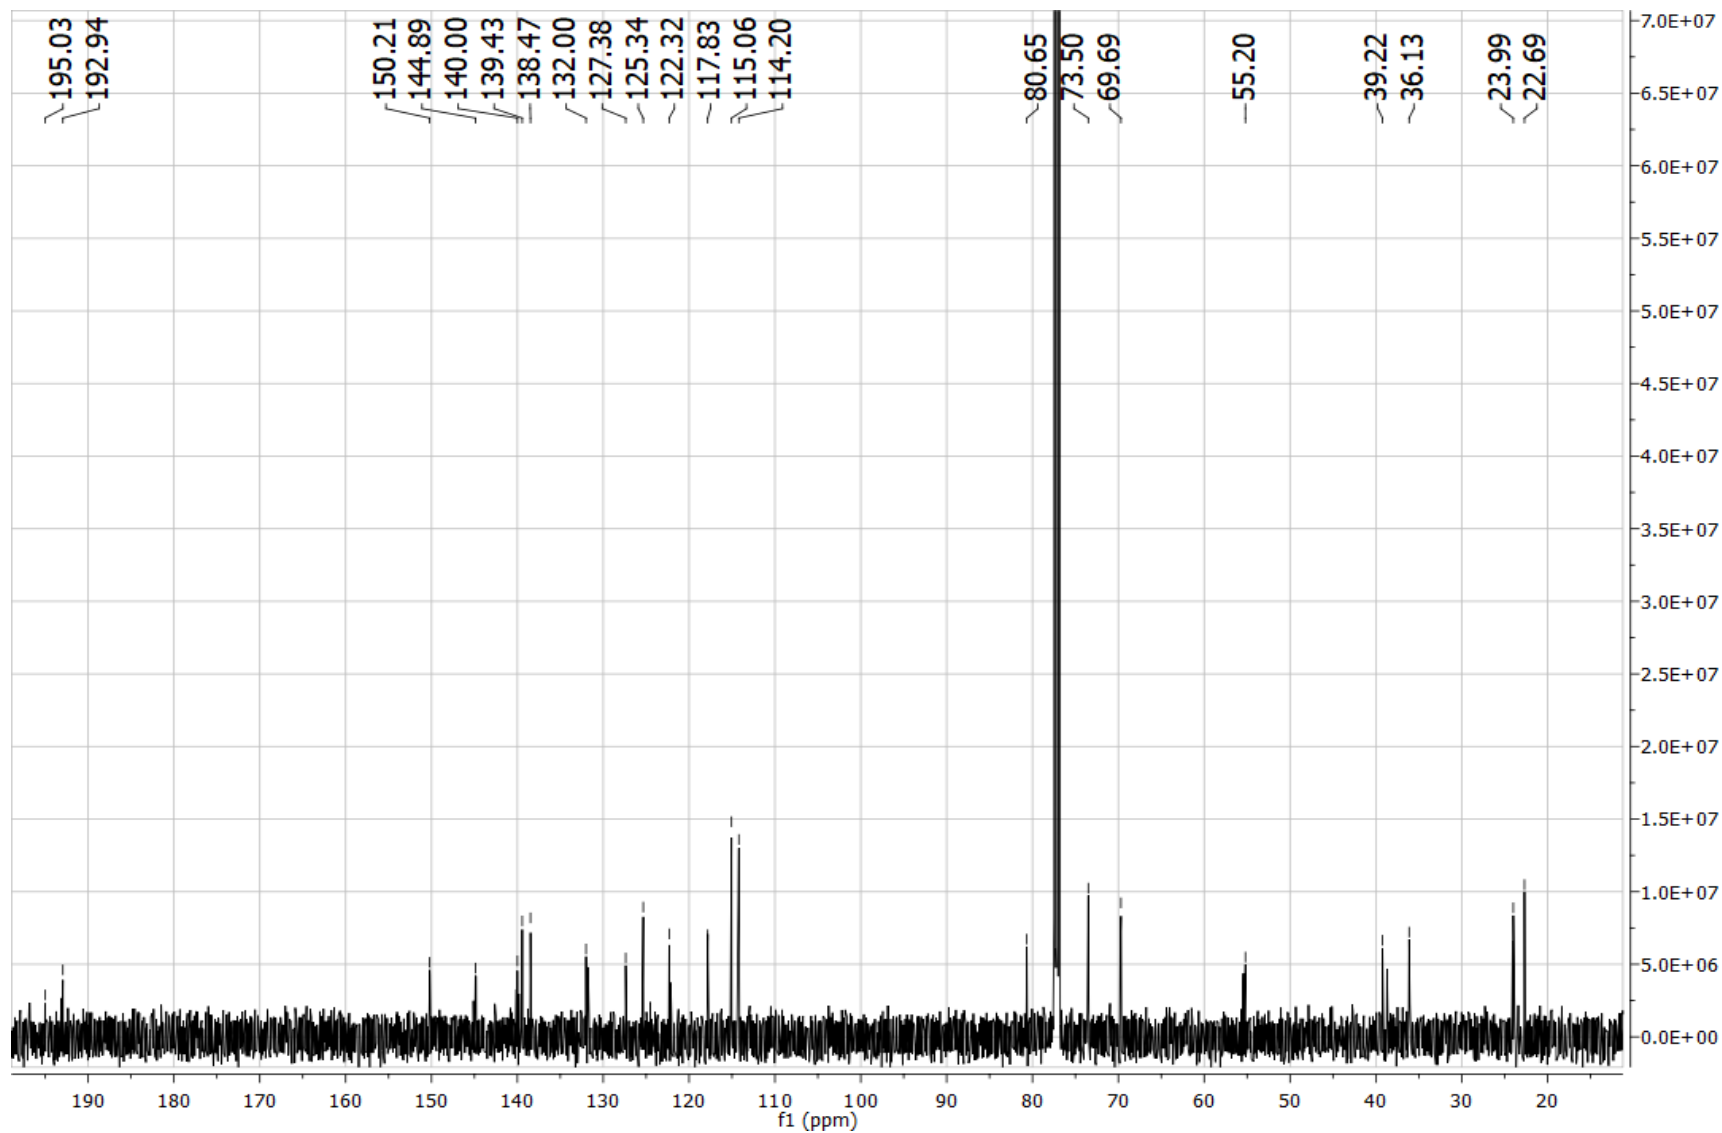

**Figure S18.**  $^{13}\text{C}$  NMR spectrum of ehretiquinone D (**5**) measured in  $\text{CDCl}_3$ .

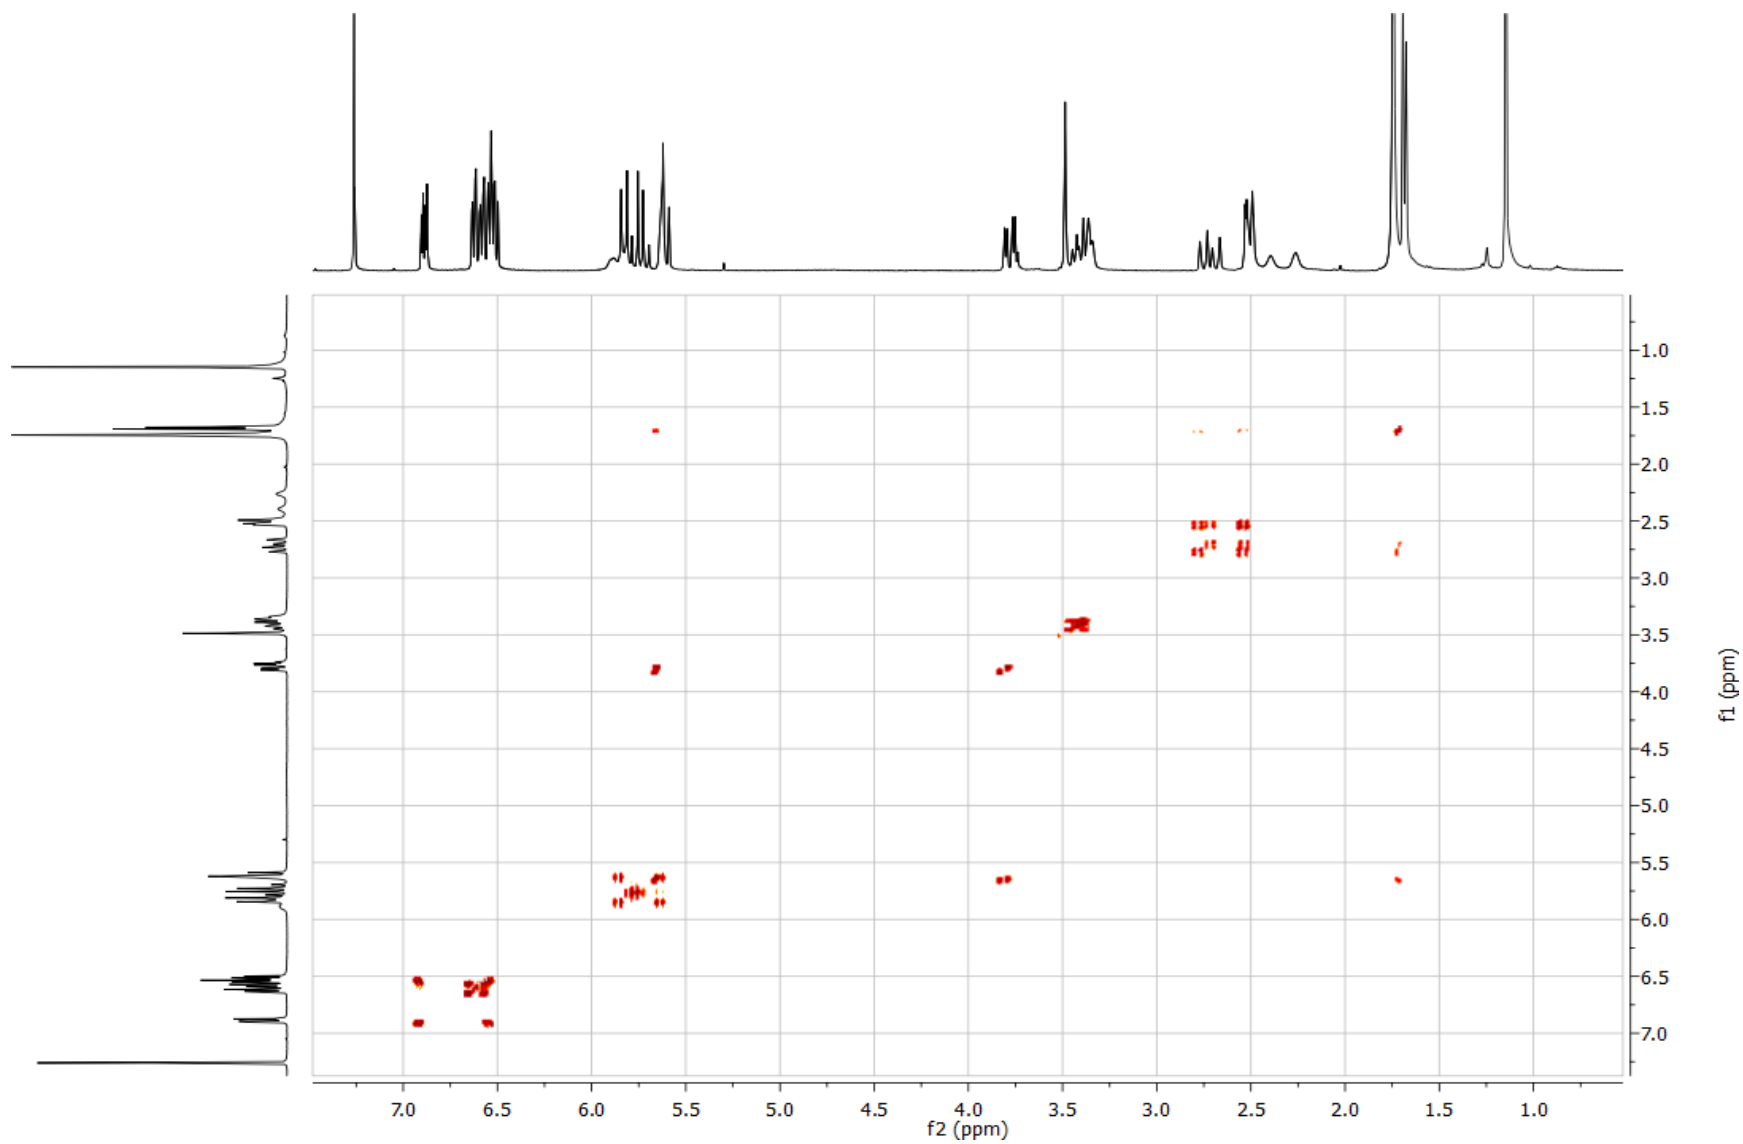

**Figure S19.** <sup>1</sup>H-<sup>1</sup>H COSY spectrum of ehretiquinone D (**5**) measured in CDCl<sub>3</sub>.

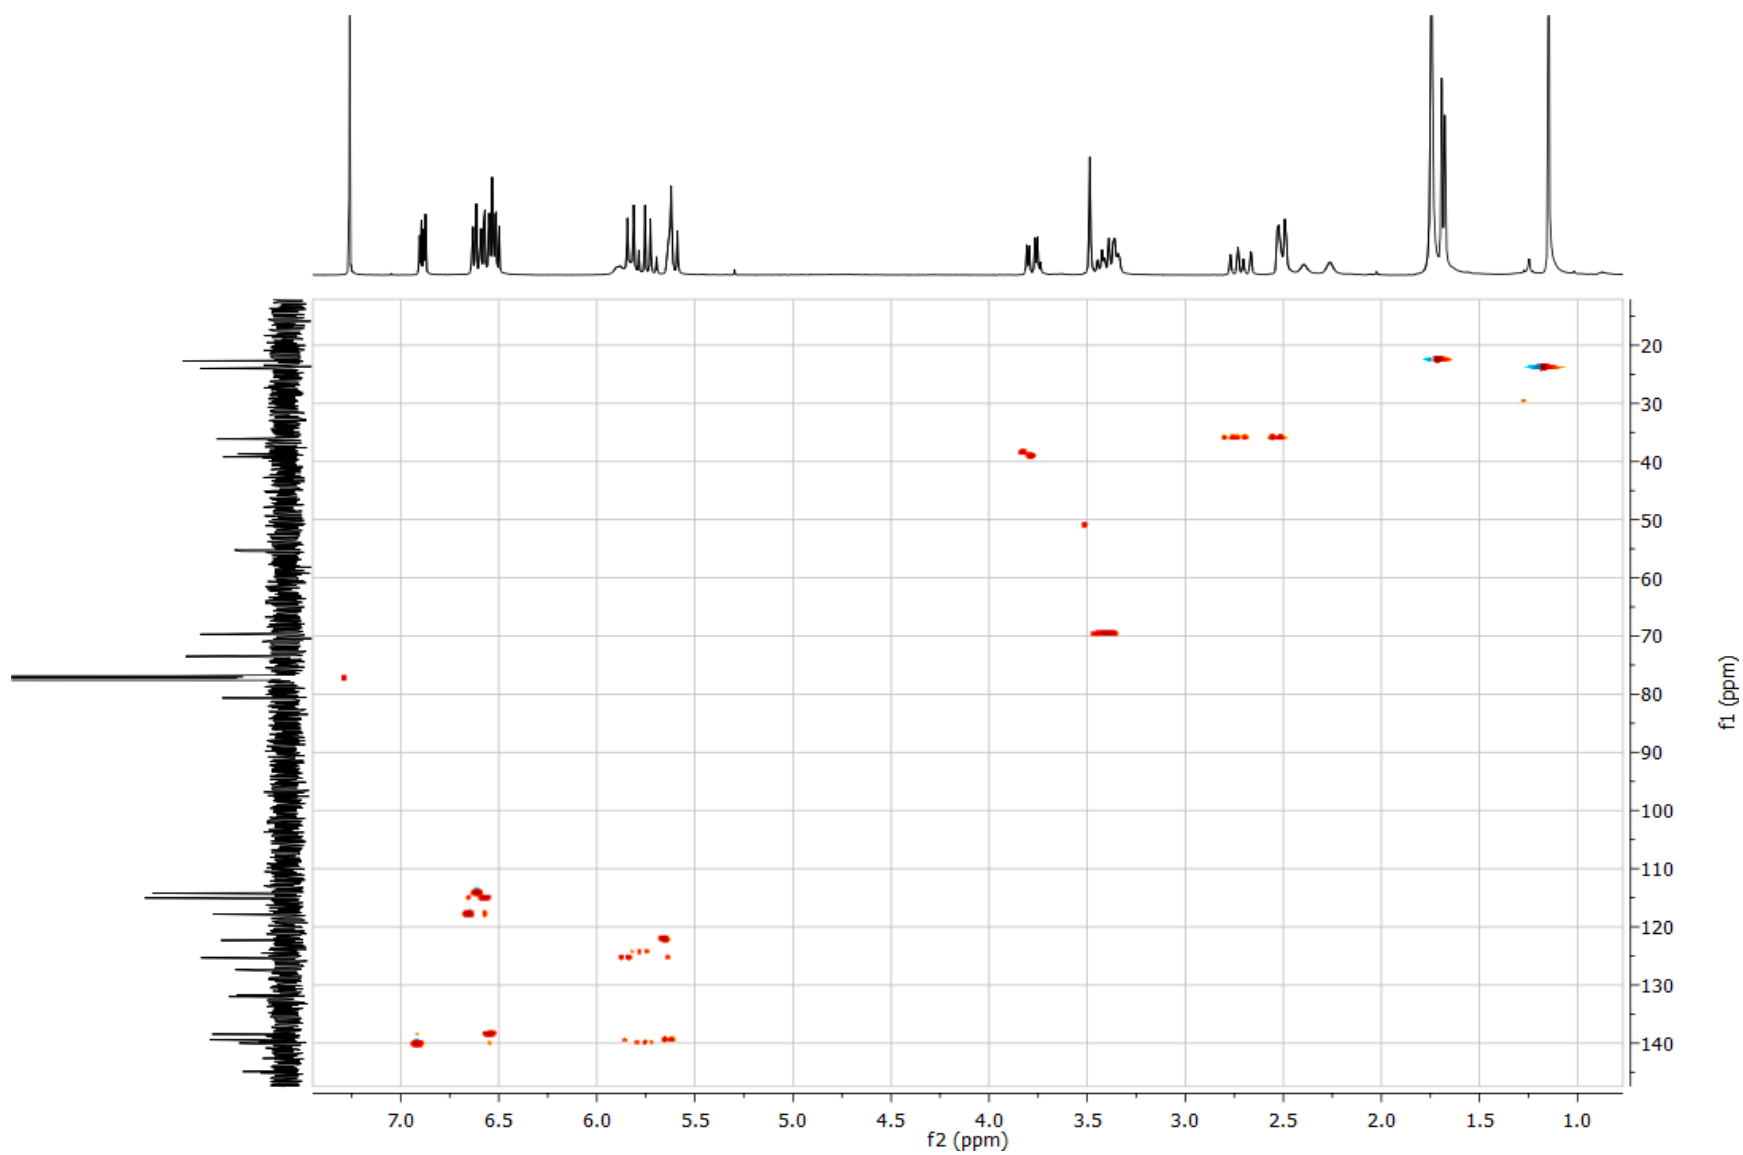

**Figure S20.** HSQC spectrum of ehretiquone D (**5**) measured in CDCl<sub>3</sub>.

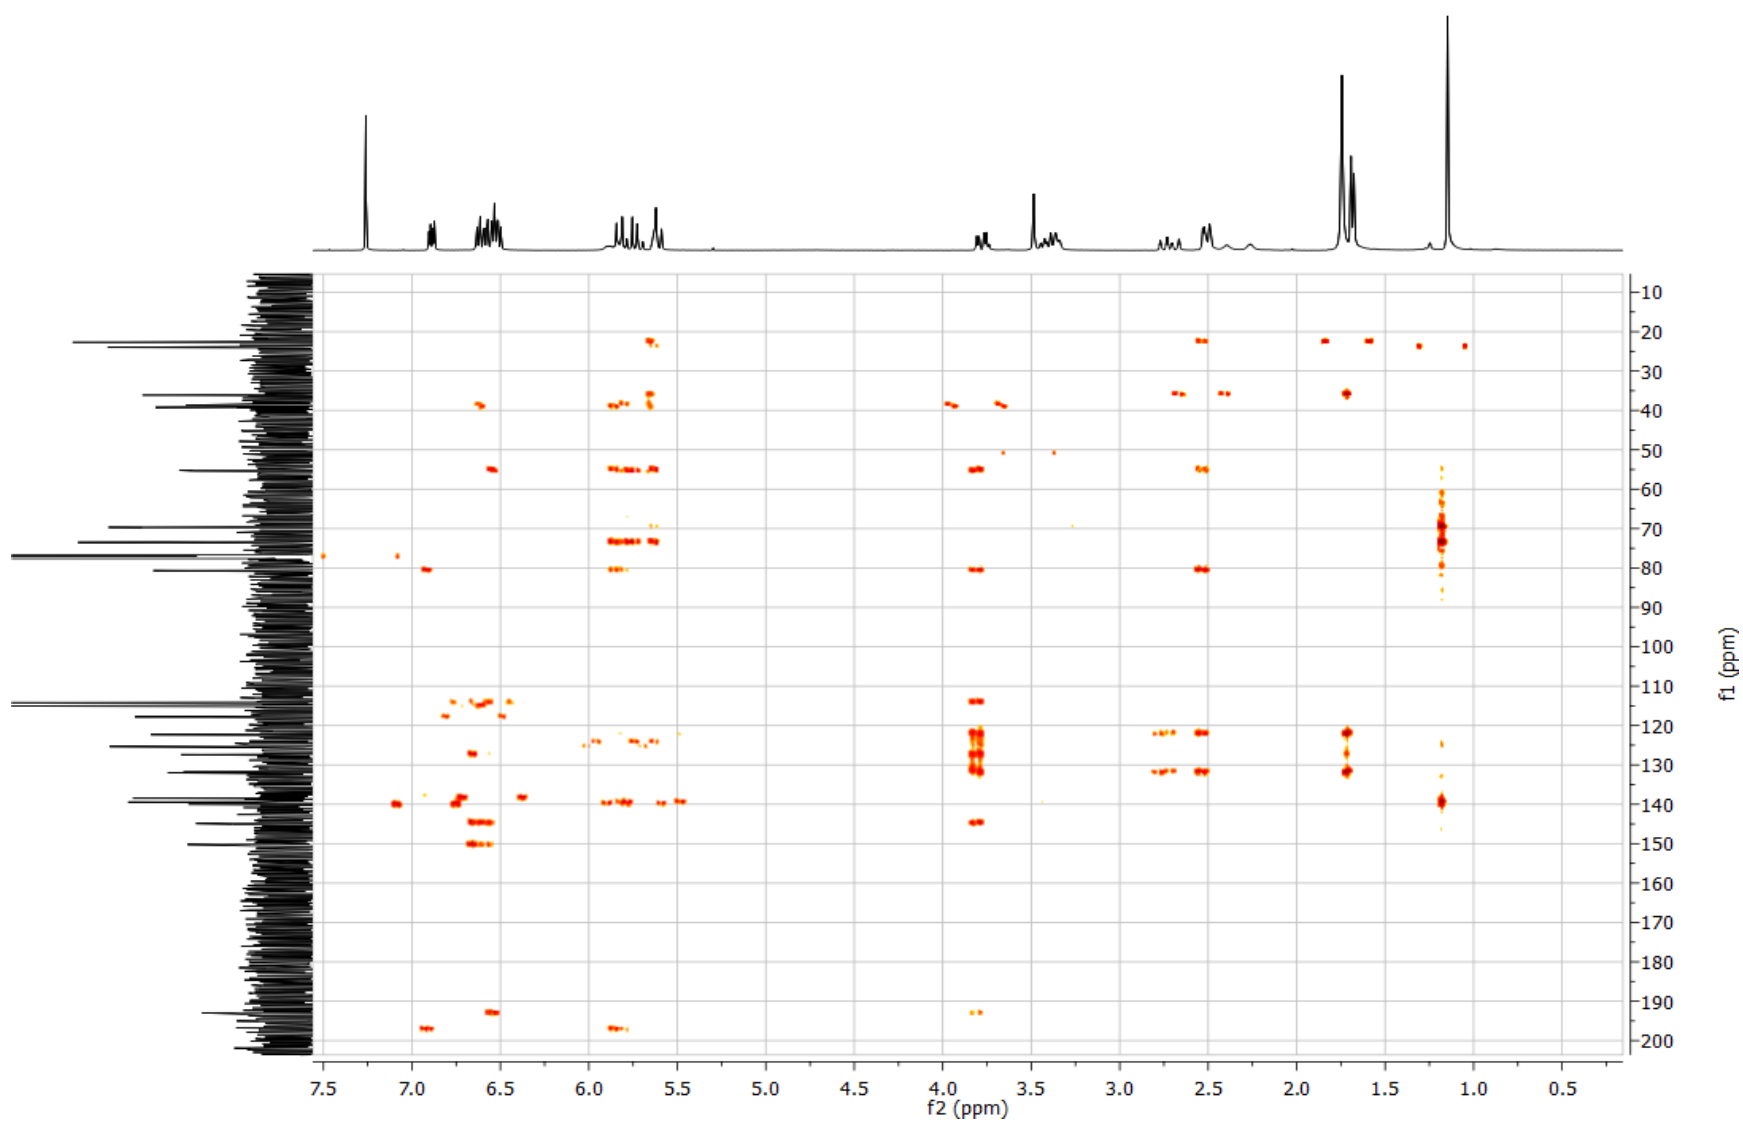

**Figure S21.** HMBC spectrum of ehretiquinone D (**5**) measured in CDCl<sub>3</sub>.

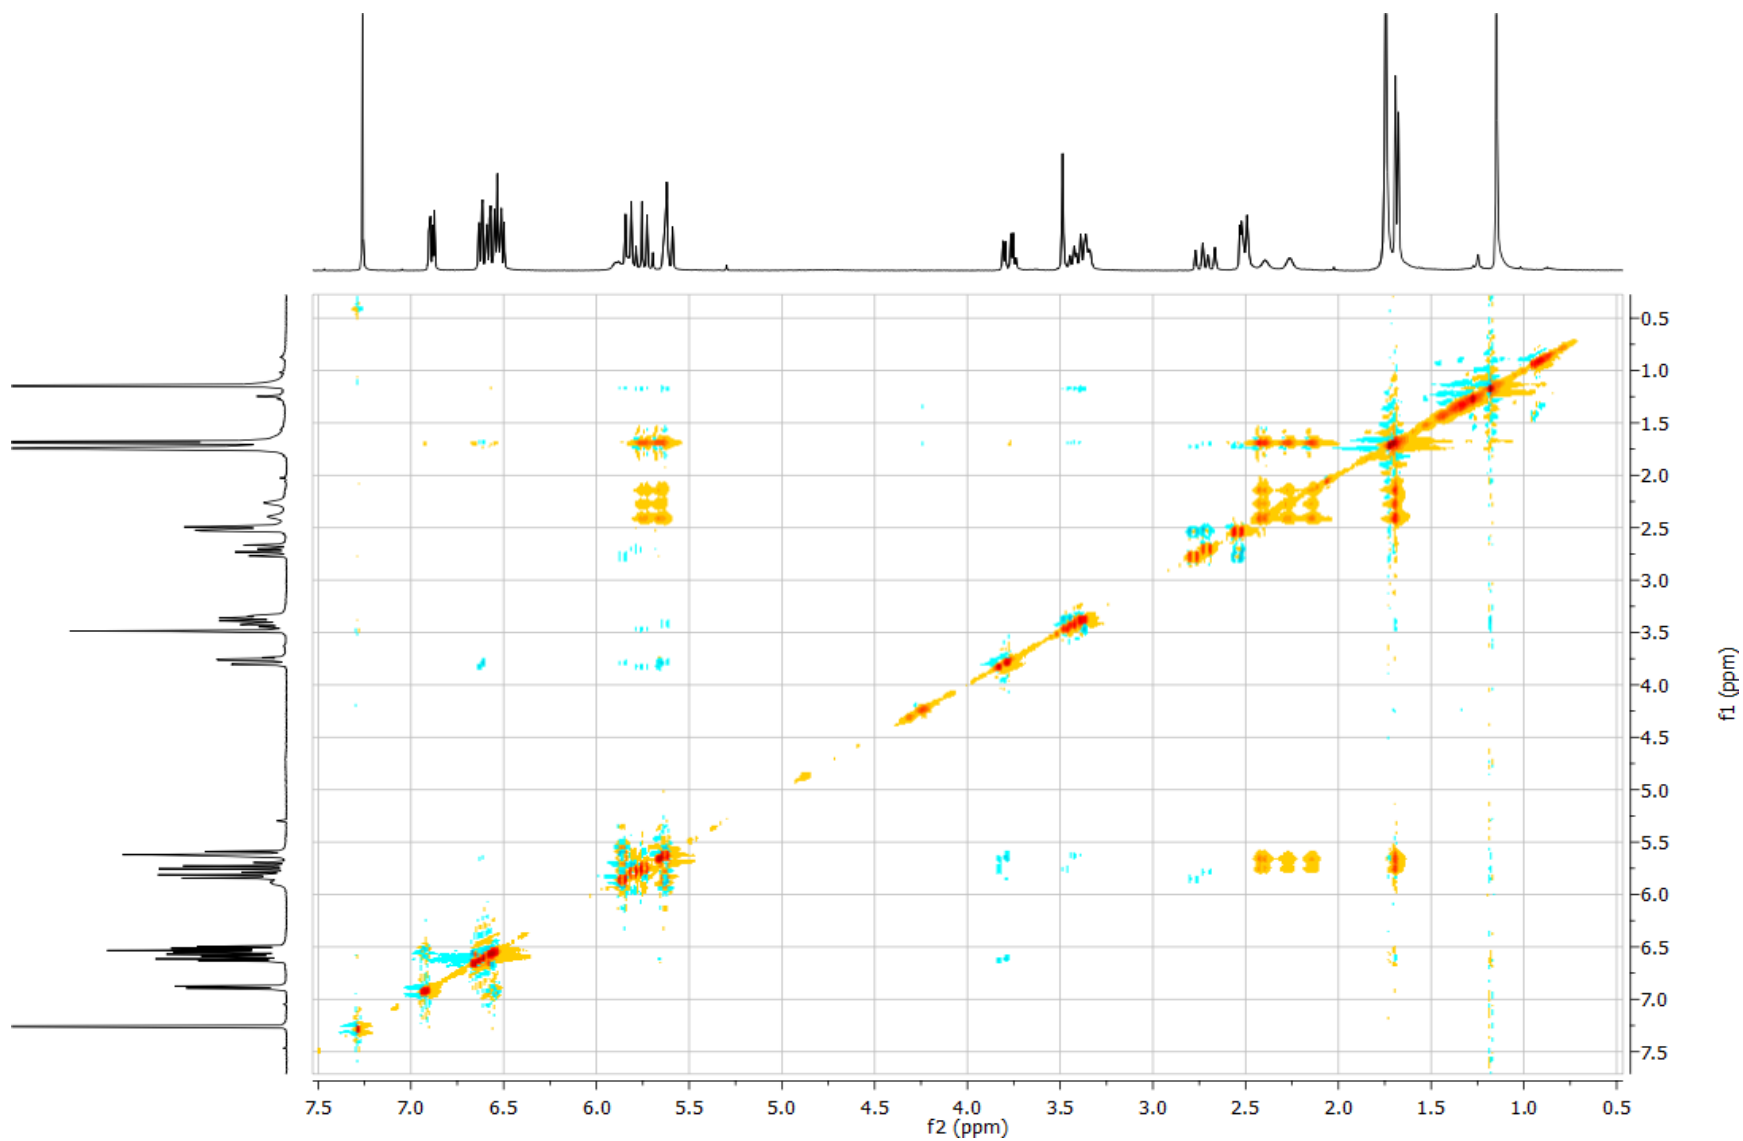

**Figure S22.** NOESY spectrum of ehretiquinone D (**5**) measured in CDCl<sub>3</sub>.
